1 A computational model of intrathalamic signaling via open-loop thalamo-reticular-thalamic architectures

2

3 Jeffrey W. Brown<sup>1</sup>, Aynaz Taheri<sup>2</sup>, Robert V. Kenyon<sup>2</sup>, Tanya Berger-Wolf<sup>2</sup>, and Daniel A. Llano<sup>1,3,4,5</sup>

4

5 1. University of Illinois College of Medicine at Urbana-Champaign, Urbana, IL 61801

6 2. Department of Computer Science, University of Illinois at Chicago, Chicago, IL 60607

7 3. Beckman Institute for Advanced Science and Technology, University of Illinois at Urbana-  
8 Champaign, Urbana, IL 61801

9 4. Neuroscience Program, University of Illinois at Urbana-Champaign, Urbana, IL 61801

10 5. Department of Molecular and Integrative Physiology, University of Illinois at Urbana-  
11 Champaign, Urbana, IL 61801

12

13 Corresponding Author:

14 Daniel Llano, M.D., Ph.D.

15 2355 Beckman Institute

16 405 North Mathews Avenue

17 Urbana, IL 61801

18 [d-llano@illinois.edu](mailto:d-llano@illinois.edu)

19 (217) 244-0740

20

21

22

23

24

25

26

27

28 **Abstract:**

29 The thalamic reticular nucleus (TRN), a sheet of GABAergic neurons that partially envelops, receives  
30 excitatory input from, and projects inhibitory output to the dorsal thalamus, is known to form part of the  
31 thalamus' intrinsic connectivity. In this capacity, the TRN has been shown to play a critical role in  
32 shaping physiological phenomena such as spindle-wave and absence-seizure activity, while it is also  
33 speculated to contribute to integrative neural functions such as arousal and attention. It was long supposed  
34 that pairs of thalamic relay (TC) and TRN neurons formed "closed" disynaptic loops, in which a TC  
35 neuron was inhibited by the TRN neuron it excited. Recent experimental observations and modeling  
36 studies, however, support both the existence and potential functional significance of "open-loop"  
37 thalamo-reticulo-thalamic (TC-TRN-TC) synaptic motifs, in which neurons from the TRN are not  
38 reciprocally excited by the TC neurons they inhibit. We hypothesized that these structural modules, when  
39 connected in series, might underlie certain modes of signal propagation from one part of the thalamus to  
40 another. In the present study, we sought to evaluate the relative capacities of closed- and open-loop TC-  
41 TRN-TC synaptic configurations to support both stimulus-evoked propagation and oscillation, both of  
42 which characterize a variety thalamic and thalamocortical waveforms, while simultaneously exploring the  
43 possibility that synaptic connections exclusive to the TRN, of which both chemical or electrical varieties  
44 have been identified, might cooperatively or separately underlie these wave properties. To this end, we  
45 generated and simulated permutations of a small thalamo-reticular-cortical network, allowing select  
46 synapses to vary both by class (homogeneously) and independently (heterogeneously), and examined how  
47 synaptic variations altered the propagative and oscillatory properties of the stimulus-driven responses  
48 arising in the networks. Our analysis revealed that 1) stimulus-evoked signal propagation was best  
49 supported in networks possessing strong open-loop TC-TRN-TC connectivity; 2) oscillation arose most  
50 commonly though one of two mechanisms, one of which involved periodically occurring post-inhibitory  
51 rebound induced by the TRN in the thalamus and required strongly closed-loop TC-TRN-TC motifs and  
52 the other of which was characterized by the propagation of oscillatory activity across a network and was  
53 dependent on uniformly strong reticulothalamic synapses; 3) intrareticular synapses were neither primary  
54 substrates of propagation nor oscillation, tending to interfere with the former and either attenuating or

55 facilitating a weak, nondominant form of the latter; 4) neither the average propagative nor oscillatory  
56 efficiency of those network permutations best accommodating these properties significantly changed as a  
57 function of altering the duration of a fixed, external stimulus applied to them; and 5) heterogeneously  
58 synaptic networks tended to support more robust oscillation than their homogeneous counterparts, while  
59 the capacity to support propagation did not depend on the spatial uniformity synaptic weights. We relate  
60 these findings to those elucidated by related modeling studies constructed around exclusively closed-loop  
61 TC-TRN-TC connectivity and discuss the functional implications of both thalamic architectures relative  
62 to experimental data concerning normal and pathological processes in the thalamus.

63

64 **Significance Statement:**

65 Interactions between the dorsal thalamus, which functions as a relay for sensory, motor, and integrative  
66 information from subcortical brain structures to the cerebral cortex, and thalamic reticular nucleus (TRN)  
67 are known to underlie various neurophysiological waveforms and are speculated to contribute to  
68 phenomena such as arousal, attention, sleep, and epileptic processes. Despite this, the synaptic  
69 microarchitectures forming the basis for dorsal thalamus-TRN interactions are not fully understood. The  
70 computational neural model we present in this manuscript is among the first to incorporate so-called  
71 “open-loop” thalamo-reticular-thalamic (TC-TRN-TC) synaptic motifs, which have been experimentally  
72 verified in both anatomical and physiological studies. We elucidate how open-loop motifs possess the  
73 capacity to shape the propagative and oscillatory properties of signals intrinsic to the thalamus and  
74 evaluate the wave dynamics they support relative to closed-loop TC-TRN-TC pathways and intrareticular  
75 synaptic connections. Our model also generates predictions regarding how different spatial distributions  
76 of reticulothalamic and intrareticular synapses affect these signaling properties.

77

78

79

80

81

82 **Introduction:**

83 The thalamus has long been regarded as the “relay station” of the brain, through which most sensory  
84 information travels to reach dedicated areas of the cerebral cortex. While pathways between the thalamus  
85 and cortex have been extensively studied, both structurally and functionally, the nature and functional  
86 significance of intrathalamic pathways and signal propagation represent outstanding questions.  
87 Monosynaptic connections between thalamic relay (thalamocortical; TC) neurons are not believed to exist  
88 abundantly within the mature mammalian brain (Smith et al., 2006; Lee et al., 2010), and while inhibitory  
89 interneurons found in thalamic nuclei of certain mammalian species project to TC neurons (Guillery and  
90 Sherman, 2002; Sherman, 2004), there is no evidence that these interneurons participate in disynaptic  
91 pathways between TC neurons.

92  
93 In fact, the major intermediary allowing for communication between thalamic relay neurons, the thalamic  
94 reticular nucleus (TRN), is extrinsic to the thalamic nuclei in which these neurons reside. The TRN is a  
95 sheet of GABAergic neurons in the ventral thalamus that partially envelops the dorsal thalamus (typically  
96 considered the “thalamus proper,” in which all first- and higher-order thalamic nuclei are found; Pinault,  
97 2004). Although the TRN was identified in the late 19<sup>th</sup> Century and has been recorded from extensively  
98 in slice preparations, a dearth of *in vivo* recordings owing to the TRN’s deep position within the brain has  
99 left a lack of definitive information on the structure’s integrative functional significance; the structure has,  
100 however, been speculated to participate in phenomena ranging from selective attention (Crick, 1984;  
101 Guillery et al., 1998; McAlonan et al., 2006) to sleep and arousal (Llinás and Paré, 1991; Steriade et al.,  
102 1993), and may also play a role in generating certain kinds of seizures (von Krosigk et al., 1993; Bal et  
103 al., 1995; Destexhe et al., 1996a; Huguenard, 1998; McCormick and Contreras, 2001) and  
104 neurodevelopmental disorders (Wells et al., 2016; Krol et al., 2018). The TRN projects exclusively to TC  
105 neurons of the dorsal thalamus, with the former functioning as the latter’s primary source of inhibition  
106 and, consequently, as a putative filter of thalamocortical signaling (Sherman and Guillery, 2001).  
107 Reciprocal, glutamatergic thalamoreticular (TC-TRN) connections are also known to exist, with the  
108 bidirectional communication between the dorsal thalamus and TRN thought to form the minimal network

109 necessary for the generation and propagation of sleep spindles, a waveform endemic to stage 2 NREM  
110 sleep (Steriade and Deschênes, 1984; Steriade et al., 1987; von Krosigk et al., 1993; Bal et al., 1995; Kim  
111 et al., 1995; Ulrich and Huguenard, 1997).

112

113 The structural constitution of bidirectional pathways connecting the dorsal thalamus and TRN has been  
114 the subject of ongoing debate. It was originally assumed that thalamo-reticulo-thalamic (TC-TRN-TC)  
115 pathways were reciprocal in nature, forming “closed loops” of recurrent inhibition delivered to TC  
116 neurons (Fig. 1A, left; Hale et al., 1982; Steriade et al., 1993; Warren et al., 1994; Sherman and Guillery,  
117 1996; Pinault, 2004). While closed disynaptic loops have indeed been confirmed with *in vivo* and *in vitro*  
118 electrophysiological studies in both the rat and cat thalamus, they were only identified in a minority of  
119 examined TC-TRN pairs (Shosaku, 1986; Lo and Sherman, 1994; Gentet and Ulrich, 2003; Pinault,  
120 2004); these observations were consistent with anatomical tracing studies in both species (Pinault and  
121 Deschênes, 1998; FitzGibbon et al., 2000). Another connectional scheme between the dorsal thalamus  
122 and TRN is the so-called “open-loop” TC-TRN-TC pathway, wherein a TC neuron is not reciprocally  
123 inhibited by the TRN neuron it excites (Fig. 1A, right); within the thalamus, this disynaptic motif  
124 functions as a substrate for lateral inhibition. Open-loop configurations have been inferred from  
125 recordings in rodent thalamic slice preparations (Crabtree et al., 1998; Crabtree and Isaac, 2002; Lam and  
126 Sherman, 2005; Lee et al., 2010; Lam and Sherman, 2015) and identified in anatomical labeling studies  
127 (Pinault and Deschênes, 1998; Kimura et al., 2007; Kimura, 2014). Furthermore, open-loop pathway  
128 variants in the form of X-TRN-TC are also known to exist, with X representing potentially indirect  
129 sources of modulation to the sensory thalamus via the TRN, such as monoaminergic and cholinergic  
130 brainstem nuclei, nuclei of the basal forebrain, amygdala, and multimodal association cortex (Asanuma  
131 and Porter, 1990; Bickford et al., 1994; Zikopoulos and Barbas, 2006; Sun et al., 2013; Pita-Almenar et  
132 al., 2014).

133

134 Several computational models simulating either thalamic (Destexhe et al., 1993; Destexhe et al., 1994;  
135 Golomb et al., 1996; Destexhe et al., 1996a; Sohal and Huguenard, 1998; Bazhenov et al., 1998;

136 Wasylenko et al., 2010; Pham and Haas, 2018) or thalamocortical networks (Destexhe et al., 1998;  
137 Bazhenov et al., 2002; Traub et al., 2005; Izhikevich and Edelman, 2008; Rogala et al., 2013) and  
138 incorporating closed-loop TC-TRN-TC pathways have reproduced propagative and/or oscillatory  
139 waveforms intrinsic to the thalamus with high fidelity, including sleep spindles, epileptiform activity, and  
140 gamma oscillations, and have engendered important dynamical clarifications or experimentally verifiable  
141 predictions in relation to these phenomena. In a departure from these computational studies and in an  
142 effort to explore the effects of thalamocortical transmission within an open-loop thalamoreticular system,  
143 our research group previously simulated a one-dimensional, three-neuron thalamo-reticulo-cortical  
144 computational network, in which a TRN neuron projected to a TC neuron non-reciprocally (i.e., in an  
145 open-loop manner), with both the TC and TRN neurons receiving stochastic external input (Willis et al.,  
146 2015). We reported that the open-loop TC-TRN-TC pathway, rather than uniformly depressing thalamic  
147 (and consequently cortical) activity, paradoxically enhanced thalamocortical output over a domain of TC  
148 and TRN input frequencies. This demonstrated the capacity of an open-loop system to function as a  
149 tunable filter of thalamocortical transmission, subject to the temporal dynamics of input to the TRN,  
150 whether from other, non-reciprocally connected TC neurons or extrinsic sources. In both our previous  
151 model and earlier models built on closed-loop TC-TRN-TC synaptic motifs, the post-inhibitory rebound  
152 (PIR) exhibited by TC neurons, as mediated by T-type  $\text{Ca}^{2+}$  channels and driven by inhibition from the  
153 TRN, served as a catalyst of signal propagation within the networks: in the case of the open-loop network,  
154 PIR could enhance vertical (thalamocortical) transmission, while in closed-loop networks, it could drive  
155 both horizontal (intrathalamic) and vertical signal propagation (Destexhe et al., 1993; Golomb et al.,  
156 1996; Destexhe et al., 1996a; Destexhe et al., 1998; Sohal and Huguenard, 1998; Bazhenov et al., 1998;  
157 Bazhenov et al., 2002; Traub et al., 2005; Rogala et al., 2013; Willis et al., 2015; Pham and Haas, 2018).  
158 In physiological studies, TRN-driven PIR has been observed to promote thalamic bursting behavior (von  
159 Krosigk et al., 1993; Sherman, 2001; Halassa et al., 2011).

160

161 Based on previous physiological characterizations and computational modeling of open-loop TC-TRN-  
162 TC synaptic organization, we hypothesized that these synaptic modules might underlie intrathalamic

163 signal propagation. Accordingly, we sought in the present study to test this hypothesis, specifically  
164 evaluating the efficacy of open-loop pathways relative to other potential synaptic configurations in  
165 mediating signal transmission across the thalamus. To this end, we constructed a baseline model network  
166 based on that of Willis et al. (2015) by connecting in series three thalamo-reticulo-cortical (layer 4)  
167 pathways, or TC-TRN-L4 “columns,” potentially featuring either or both closed- and open-loop TC-TRN-  
168 TC motifs, with the latter constituting one mode of connectivity between parallel TC-TRN-L4 columns.  
169 Intrareticular synapses represented the other structural connections between columns, based on the  
170 identification of both GABAergic (Ahlsén and Lindström, 1982; Steriade et al., 1990; Cox et al., 1996;  
171 Sanchez-Vives et al., 1997; Shu and McCormick, 2002; Deleuze and Huguenard, 2006; Lam et al., 2006)  
172 and electrical synapses (Landisman et al., 2002; Long et al., 2004; Fuentealba et al., 2004; Deleuze and  
173 Huguenard, 2006; Lam et al., 2006) between TRN neurons. Thus, we included three different  
174 polysynaptic, intercolumnar pathway configurations in our network (Fig. 1B, from left to right): 1) those  
175 with a central chemical intrareticular synapse; 2) those with a central electrical intrareticular synapse; and  
176 3) open-loop TC-TRN-TC pathways.

177  
178 To analyze how each variety of intercolumnar pathway contributed to network dynamics, permutations of  
179 the baseline network were generated by varying three properties associated with each of the intercolumnar  
180 synaptic motifs: 1) the conductance of GABAergic TRN-TRN synapses; 2) the electrical coupling  
181 coefficient between TRN neurons; and 3) a TC-TRN-TC “openness” coefficient that corresponded to the  
182 ratio of lateral to recurrent reticulothalamic connections within the network. In an effort to account for the  
183 varying degrees of spatial uniformity with which intrareticular and TC-TRN-TC synaptic architectures  
184 might be distributed within the thalamus, the synaptic parameters were varied in one of two manners: 1)  
185 homogeneously, whereby parameters were varied systematically within each variable synaptic class and  
186 across a range of discrete physiological values, or 2) heterogeneously, where parameters varied discretely  
187 for every individual intracolumnar synapse and in which the TC-TRN-TC openness coefficient was  
188 replaced by the conductances of individual reticulothalamic (TRN-TC) synapses. We quantified network  
189 dynamics as a function of variable TC-TRN-TC and intrareticular synaptic architectures by defining and

190 measuring two properties inherent to stimulus-evoked responses in each network variant: propagation and  
191 oscillation, with the latter included in light of the fact that many characterized thalamic waveforms both  
192 oscillate and propagate through the thalamus (Sherman and Guillery, 2001). We furthermore compared  
193 the relative capacities of homogeneous and heterogeneous network permutations to support these  
194 properties.

195

## 196 **Computational Model and Methods:**

### 197 *Intrinsic neuronal models*

198 Our network model was directly based on an earlier incarnation published by our research group (Willis  
199 et al., 2015). Single-compartment TC, TRN, and cortical (L4) model neurons obeyed Hodgkin-Huxley  
200 kinetics, with membrane potentials  $V$  varying according to the first-order differential equation

$$201 \quad C \frac{dV}{dt} = -g_L(V - E_L) - \sum_i g_i(V)(V - E_i) \quad (1)$$

202 where  $C$  is the membrane capacitance,  $g_L$  and  $E_L$  are the leakage conductance and reversal potential,  
203 respectively, and  $g_i(V)$  and  $E_i$  are the dynamic conductance and reversal potential, respectively, of the  $i$ th  
204 voltage-gated, ligand-gated (chemical synaptic), or electrical synaptic conductance (for electrical synaptic  
205 conductances, the effective reversal potential is equal to the presynaptic membrane potential; see  
206 Equation 2a). All three varieties of model neurons expressed both the standard transient sodium ( $I_{Na}$ ) and  
207 delayed-rectifier potassium ( $I_K$ ) currents, as reported by Willis et al. (2015). TC and TRN neurons  
208 additionally included a T-type calcium conductance (t-current;  $I_T$ ) and hyperpolarization-activated cation  
209 current (h-current;  $I_H$ ), following the TC model of Deleuze et al. (2012). Both TRN and L4 cells  
210 expressed a slow, non-inactivating potassium conductance ( $I_M$ ), following the modeling of Pospichil et al.  
211 (2008), which accounts for the spike-frequency adaptation previously reported in physiological recordings  
212 from these neurons (Yamada et al., 1989; Willis et al., 2015). A list of intrinsic model cell parameters,  
213 including current conductances, reversal potentials, selected gating kinetics, and membrane capacitance,  
214 can be found in Table 1.

215



216 *Synaptic models*

217 The kinetics of chemical synapses in our model network conformed to the synaptic depression model of  
218 Tsodyks and Markram (1997; Tsodyks et al., 1998), following our previous computational network model  
219 (Willis et al., 2015). The Tsodyks and Markram model presupposes a finite quantity of “resources,” akin  
220 to synaptic vesicles, capable of being released by the presynaptic neuron; these resources can exist in an  
221 active, inactive, or recovered state. A parameter  $U_{SE}$  characterizes the fraction of recovered resources that  
222 can be converted to an active state (i.e., for release by the presynaptic neuron) following action potential  
223 induction in the presynaptic axon terminal(s). Following resource activation, synapses inactivate  
224 according to the time constant  $\tau_{inact}$ ; resources become available again for activation after a recovery  
225 period described by the time constant  $\tau_{recov}$ . These parameters, along with the neurotransmitters,  
226 postsynaptic conductances, and reversal potentials characterizing all of the chemical synapses in our  
227 model, are given in Table 2.

228

229 Glutamatergic thalamoreticular and thalamocortical (TC-L4) and baseline GABAergic reticulothalamic  
230 synaptic parameters matched those of our earlier model (Willis et al., 2015), with the latter synapses  
231 allowed to vary in conductance (see the *Network architecture and permutations* subsection for additional  
232 details). TRN-TC signaling was mediated exclusively through GABA<sub>A</sub> receptors, mirroring other  
233 thalamic and thalamocortical models in which the slower TRN-TC GABA<sub>B</sub> conductance was omitted  
234 (Traub et al., 2005; Rogala et al., 2013; Willis et al., 2015; Pham and Haas, 2018). Both GABAergic  
235 (TRN-TRN<sub>GABA</sub>) and electrical synapses (TRN-TRN<sub>Elec</sub>) were included between TRN neurons; as with  
236 TRN-TC synapses, both varieties of TRN-TRN synapses were allowed to vary in strength. Although  
237 evidence has been presented challenging the existence of GABAergic intrareticular synapses in certain  
238 mammalian species and age groups (Pinault et al., 1997; Landisman et al., 2002; Pinault, 2004;  
239 Cruikshank et al., 2010; Hou et al., 2016), our model avoided making assumptions regarding their  
240 presence, strength, or spatial distribution by allowing the associated synaptic conductances to vary over a  
241 range of physiological values, including zero, and in distribution.

242

243 Electrical synapses between TRN neurons were based on the Cx36-dependent intracellular gap junctions  
244 first identified by Landisman et al. (2002). For TRN neurons, the sum of electrical synaptic currents ( $I_{Elec}$ )  
245 entering any postsynaptic neuron  $j$  from presynaptic neurons  $i$  was included in the rightmost term from  
246 Equation 1 and calculated as

$$247 \quad I_{Elec(j)} = \sum_i g_{ij} (V_j - V_i) \quad (2a)$$

248 where  $g_{ij}$  was itself calculated as

$$249 \quad g_{ij} = D(x) \frac{g_{gap}}{1/CC - 1} \quad (2b)$$

250 where  $CC$  was the electrical coupling coefficient between TRN neurons  $i$  and  $j$ ,  $g_{gap}$  is the gap junction  
251 conductance (set at 5 nS), and  $D(x)$  was a scaling factor that depended on the physical distance between  
252 the coupled TRN neurons (see the *Network architecture and permutations* subsection for additional  
253 details; Dayan and Abbott, 2005; Traub et al., 2005; Shimizu and Stopfer, 2013). TRN-TRN<sub>Elec</sub> were  
254 symmetrical (non-rectifying), such that  $G_{ij}=G_{ji}$ .

255

256 A generalized afferent synaptic input was delivered to every TC neuron in the model. Given that the  
257 temporal profiles of both spontaneous and stimulus-evoked inputs impinging on the dorsal thalamus can  
258 vary drastically from moment to moment, these external inputs were delivered as Poisson-modulated  
259 spike trains centered at 40 Hz; the central frequency was chosen to maximize thalamocortical output  
260 relative to the saturation of the external synapse and concurrent inhibitory input being received from the  
261 TRN (Willis et al., 2015). Individual pulses lasted 0.1 ms. An additional high-frequency pulse train was  
262 inserted into neuron TC<sub>A</sub> over a fixed time interval during every network simulation run (see the  
263 *Computational methods and calculation of network dynamics* subsection for additional details). The  
264 reversal potential, conductance, and kinetics of these synapses were directly based on retinogeniculate  
265 synapses (Chen and Regehr, 2003), although the generic nature of the external inputs in our model allows  
266 them to represent not only immediately upstream sensory input but also brainstem modulation (e.g.,  
267 serotonergic, adrenergic) known to act on thalamic nuclei (Siegel and Sapru, 2015).

268

269 Given the small spatial scale of our model (see the *Network architecture and permutations* subsection for  
270 additional details), synaptic delays associated with finite axonal conductance times within the TRN and  
271 between the TRN and dorsal thalamus were disregarded, mirroring the simplification incorporated into  
272 previous thalamic and thalamocortical models simulating synaptic interactions on the order of 100  
273 microns (Golomb et al. 1996; Traub et al., 2005). Although small (~1 ms) thalamocortical delays were  
274 inserted into the network model of Traub et al. (2005), these were likewise omitted on the basis of the  
275 cortex functioning solely as an output layer in our model. A table containing the conductances, reversal  
276 potentials, and gating kinetics for synaptic currents and further details thereof may be found in SI:  
277 Materials and Methods.

278

### 279 *Network architecture and permutations*

280 We constructed a 3 x 3-neuronal network comprising three interconnected thalamo-reticulo-cortical  
281 columns for use in this study (Fig. 2A). Thalamic, reticular, and cortical cell layers were aligned with one  
282 another topographically, such that TC<sub>A</sub> projected to both TRN<sub>A</sub> and L4<sub>A</sub> (Jones, 1975; Destexhe et al.,  
283 1998; Sohal et al., 2000; Sherman and Guillery, 2001; Pinault, 2004). The TC-TRN and TRN-TC  
284 synapses in our model were strictly local and minimally divergent (or non-divergent, in the case of TC-  
285 TRN synapses) in order to preserve disynaptic TC-TRN-TC open-loop motifs and analyze the signal  
286 propagation they may support; see the Discussion section for an elaboration of this point. Both varieties  
287 of intrareticular synapse, by contrast, were allowed to diverge, targeting both adjacent and non-adjacent  
288 TRN neurons. We extrapolated the attenuation of intrareticular synaptic strength as a function of  
289 intracellular distance based on mappings of intrinsic connections within the TRN along a horizontal  
290 (anteroposterior) plane assembled by Deleuze and Huguenard (2006). Assuming 1) an intracellular  
291 distance of 50  $\mu\text{m}$  between adjacent TRN neurons, 2) a distance  $x$  (in multiples of 50  $\mu\text{m}$ ) between non-  
292 adjacent neurons, and 3) a Gaussian falloff in synaptic strength (Sohal and Huguenard, 2000), the  
293 baseline (adjacent-neuron) conductances of TRN-TRN<sub>GABA</sub> and TRN-TRN<sub>Elec</sub> synapses were scaled for  
294 non-adjacent synapses using the function

295 
$$D(x) = e^{-\frac{x^2}{2\lambda^2}} \quad (3)$$

296 where  $\lambda_{\text{GABA}}=531 \mu\text{m}$  and  $\lambda_{\text{Elec}}=130 \mu\text{m}$ .

297

298 In the case of so-called homogeneously synaptic network permutations, the conductances or coupling  
299 coefficients associated with three classes of synapses were allowed to vary discretely and uniformly  
300 within their class, with all external, TC-TRN, and TC-L4 synaptic conductances held constant: 1) TRN-  
301 TRN<sub>GABA</sub> synapses ranged in conductance between 0 and 450 nS in steps of 50 nS; 2) TRN-TRN<sub>Elec</sub>  
302 synapses ranged in coupling coefficient between 0 and 0.36 in steps of 0.06; and 3) a TC-TRN-TC  
303 “openness” coefficient, defined as the weight distribution of lateral (open-loop, comprising 2 synapses of  
304 the form TRN<sub>i</sub>→TC<sub>i+l</sub>) vs. recurrent (closed-loop, comprising 3 synapses of the form TRN<sub>i</sub>→TC<sub>i</sub>)  
305 reticulothalamic connectivity, varied between 0 (completely closed-loop) and 1.0 (completely open-loop)  
306 in steps of 0.1 (e.g, with a baseline TRN-TC conductance of 80 nS, a network with a TC-TRN-TC  
307 openness coefficient of 0.7 would set the conductance of all laterally inhibitory TRN-TC synapses at 56  
308 nS and all recurrently inhibitory TRN-TC synapses at 24 nS). Accordingly, 10 (TRN-TRN<sub>GABA</sub>) x 7  
309 (TRN-TRN<sub>Elec</sub>) x 11 (TC-TRN-TC) or 770 homogeneous network variants were generated.

310

311 For the heterogeneously synaptic network variants, all TRN-TRN and TRN-TC synapses (6 TRN-  
312 TRN<sub>GABA</sub> + 3 TRN-TRN<sub>Elec</sub> + 5 TRN-TC) were allowed to vary discretely and independently of one  
313 another, with all other synaptic weights held constant. Here, TRN-TRN<sub>GABA</sub> synapses ranged in  
314 conductance between 0 and 400 nS in steps of 100 nS, TRN-TRN<sub>Elec</sub> synapses ranged in coupling  
315 coefficient between 0 and 0.36 in steps of 0.12, and TRN-TC synapses (both laterally and recurrently  
316 inhibitory) ranged in conductance between 0 and 80 nS in steps of 16 nS. Due to both computational and  
317 time constraints, approximately 12,600 heterogeneous network permutations out of a theoretical >7  
318 billion were generated at random. For both homogeneous and heterogeneous network variants, domains  
319 for each of the three synaptic variables were selected to include the range of conductance or coupling  
320 strengths reported in physiological measurements and/or used in similar neural models (Destexhe et al.,

321 1996a; Destexhe et al., 1998; Sohal and Hueguenard, 1998; Sohal et al., 2000; Landisman et al., 2002;  
322 Long et al., 2004; Traub et al., 2005). For both varieties of TRN-TRN synapse, we modestly extended the  
323 upper bounds of the synaptic parameter domains to capture a broader range of dynamics potentially  
324 generated by intrareticular synapses in the thalamoreticular system.

325

### 326 *Computational methods and calculation of network dynamics*

327 Our model was coded, simulated, and analyzed in MATLAB R2018b (MathWorks), utilizing both a Dell  
328 Inspiron 3847 and Hewlett-Packard Z840 running Windows 10 and nodes on the Illinois Campus Cluster  
329 (National Center for Supercomputing Applications, University of Illinois at Urbana-Champaign).

330 Simulations employed 0.1-ms time steps, with temporal integration based on the hybrid analytic-numeral  
331 integration method of Moore and Ramon (1974), which optimizes between accurate solutions to Hodgkin-  
332 Huxley and synaptic models and computational efficiency. Statistical analysis was performed in both  
333 MATLAB and R (R Core Team, 2013), with the *glmnet* package (Friedman et al., 2010) utilized within  
334 the latter platform to perform regression analyses. Multiple linear regression was employed to establish  
335 rudimentary relationships between synaptic classes (homogeneously synaptic networks) or individual  
336 synapses (heterogeneously synaptic networks) and each of the two studied network properties, even in  
337 instances where these relationships deviated from linearity. Second-order regression models with  
338 interaction terms elucidated how synaptic interactions and nonlinearities affected these network  
339 properties. Regressions were optimized using elastic net regularization, with the specific regularization  
340 hyperparameter  $\alpha$  selected to minimize each regression model's root-mean-square error (RMSE). To  
341 convey the relative influence of different synaptic classes or individual synapses on dynamic network  
342 properties, all regression coefficients are reported here as normalized to the coefficient with the largest  
343 absolute value; the effects corresponding to normalized regression coefficients (NRCs) with absolute  
344 values of less than 0.05 were disregarded as negligibly influential on network dynamics. Both paired  
345 Student *t*-tests and one-way analysis of variance (ANOVA) models were used to compare the mean  
346 property scores between different sets of networks, with Tukey's honestly significant difference tests used

347 to ascertain pairwise difference between groups in the latter. Kolmogorov-Smirnov and Levene's tests  
348 were employed to confirm normality and homogeneity of variance, respectively, when utilizing  
349 parametric mean-comparison tests; data were log-transformed as needed to conform to these  
350 prerequisites.

351  
352 Individual simulations of network activity lasted either 1.000 or 1.500 s. During every run of the 1.000-s  
353 simulations, a 200-Hz spike train lasting 50 ms and beginning at the 400-ms time index was inserted at  
354 the external synapse to TC<sub>A</sub> (fixed, "punctate" stimulation; Fig. 2B). During 1.500-s simulation runs, an  
355 extended version of the same spike train lasting 1.100 s was delivered externally to TC<sub>A</sub> (fixed,  
356 "sustained" stimulation; Fig. 2C). These high-frequency, time-locked stimuli were modeled on those used  
357 to elicit spindle-like waves in a ferret thalamoreticular slice preparation (Kim et al., 1995; Bal et al.,  
358 1995) and designed to allow for the averaging of responses within a given network permutation across  
359 simulation runs, with variations in neuronal responses from one run to the next arising due to the  
360 stochastic (Poisson-modulated) input delivered to every TC neuron. Homogeneously synaptic networks  
361 were simulated for both 1.000 s and 1.500 s, while heterogeneously synaptic networks were simulated for  
362 1.500 s. All simulations commenced with a 200-ms equilibration period, during which no external  
363 stimulation was delivered to TC neurons; this allowed all network elements to attain steady-state  
364 conditions.

365  
366 To analyze the properties of propagation and oscillation inherent to a network's stimulus-driven response,  
367 every network permutation was simulated 1,000 times. A given network's output across these  
368 simulations, as represented by action potentials in the L4 layer of the model, was compiled by assembling  
369 spike histograms consisting of 10-ms bins for every L4 neuron (Fig. 3). Both dynamic network properties  
370 were defined relative to the most downstream element of the cortical output layer, L4<sub>C</sub>. Propagation  
371 across a network was quantified as the amplitude of the initial stimulus-evoked response in the detrended  
372 L4<sub>C</sub> histogram. Because response propagation across the L4 subnetwork was consistently linear, the  
373 initial response in L4<sub>C</sub> could be predictably observed within a small, fixed interval relative to the onset of

374 stimulation (see the Results section for additional information on signal propagation velocities). The  
375 degree of oscillation supported by each network permutation was defined as the amplitude of the first off-  
376 center peak in the normalized autocorrelogram of post-stimulation activity (i.e., activity measured  
377 between 400 ms and 1500 ms) in the detrended L4<sub>C</sub> histogram; this corresponded to the degree to which  
378 activity in L4<sub>C</sub> was able to periodically recur. (Note that although other simulated neurons exhibited  
379 oscillatory activity as well, the term “oscillation” henceforth refers explicitly to oscillation in L4<sub>C</sub> as  
380 defined above, unless otherwise stated.) Both propagation and oscillation scores are reported as  
381 normalized to the maximum scores tabulated for each property across all the homogeneously and  
382 heterogeneously synaptic networks simulated in the study.

383

## 384 **Results:**

### 385 *Response of homogeneously synaptic models to a fixed, punctate stimulus*

386 Delivering a fixed, punctate external stimulus to TC<sub>A</sub> was adequate to elicit strong propagative responses  
387 within a subset of homogeneously synaptic network permutations. Signals propagated linearly across the  
388 length of networks, with stimulus-evoked responses occurring at average fixed intervals of  $102.29 \pm 0.51$   
389 ms (mean  $\pm$  standard error of the mean) between adjacent TC-TRN-L4 columns and with a mean velocity  
390 of 0.49 mm/s, assuming a 50  $\mu$ m separation between adjacent neurons in each network layer.

391

392 All 770 homogeneous network variants were ranked according to their propagation scores (Fig. 4A, top).  
393 Linear regression analysis ( $R^2=0.829$ , RMSE=0.042,  $p<0.0001$ ) demonstrated a strong positive correlation  
394 between the TC-TRN-TC openness coefficient and propagation scores (normalized regression coefficient  
395 or NRC=1.000), with propagation better supported in networks with stronger open-loop TC-TRN-TC  
396 pathways. By contrast, propagation tended to be modestly diminished as a function of increasing both  
397 chemical and electrical TRN-TRN synaptic connectivity (NRC=-0.135 and NRC=-0.193, respectively).  
398 Mechanistically, we interpreted this result to indicate that intrareticular synapses tended to interfere with  
399 the spike timing necessary for linear signal propagation via the open-loop TC-TRN lattice through which

400 they primarily traveled. Thus, the homogeneously synaptic network permutations that best accommodated  
401 signal propagation were generally ones with weak or absent synapses between TRN neurons and strong  
402 open-loop TC-TRN-TC connections. A second-order multiple regression model of propagation as a  
403 function of all three synaptic class variables ( $R^2=0.863$ ,  $RMSE=0.039$ ,  $p<0.0001$ ) revealed a significant  
404 but small negative interaction term between TRN-TRN<sub>Elec</sub> synapses and TC-TRN-TC openness ( $NRC=-$   
405  $0.239$ ), indicating that in networks where both electrical synapses were strong and TC-TRN-TC openness  
406 high, the extent of supported propagation diminished nonlinearly. A positive interaction of comparable  
407 magnitude between chemical and electrical intrareticular synapses ( $NRC=0.226$ ) tempered the negative  
408 linear effects that these two synaptic classes exerted on propagation in networks where TRN-TRN  
409 interaction was strong. No other non-negligible interaction terms with NRCs were revealed by the  
410 second-order regression model, and all the terms therein were qualitatively consistent with those in the  
411 linear regression model (Table 3). Moreover, the relative magnitude of the coefficients in the second-  
412 order regression model indicated that linear synaptic effects tended to dominate over nonlinear effects  
413 across the domains of studied synaptic weights. The mean propagation score for all networks was  $0.648 \pm$   
414  $0.006$ , with scores ranging from 0.435 to 0.923.

415  
416 Two network permutations exhibiting fully open-loop TC-TRN-TC connectivity (openness coefficient or  
417  $OC=1.0$ ), in which propagation was generally robust, were selected for further analysis (these networks  
418 are labeled in Figs. 4A, top, and 4B, left). Each network was indexed by its synaptic variables ([TRN-  
419 TRN<sub>GABA</sub> conductance (in nS), TRN-TRN<sub>Elec</sub> coupling coefficient, TC-TRN openness coefficient]):  
420 Network a ([0,0,1.0]) and Network b ([450,0.36,1.0]). The propagation score of Network a, 0.913, was the  
421 2<sup>nd</sup> highest of the 770 ranked networks, with Network b scoring 0.757 (89<sup>th</sup>). Consistent with regression  
422 analysis, the extent of response propagation in fully open-loop networks (i.e.,  $OC=1.0$ ) was maximal  
423 when TRN-TRN synapses, both chemical and electrical, were absent, with increasing electrical coupling  
424 between TRN neurons attenuating propagation more rapidly than increasing GABAergic projection  
425 strength (Fig. 4B, left). Voltage traces of all network neurons depict activity, both preceding and



426 following fixed, punctate external stimulation of TC<sub>A</sub> (yellow arrows), during representative 1.0-s  
427 simulations of Networks a and b (Fig. 4C, left and center). Both isolated spikes and bursts, defined as at  
428 least three spikes occurring in rapid succession, were observed intermittently in neurons found in all three  
429 network layers. In Network a, stimulus-evoked activity tended to propagate smoothly from TC<sub>A</sub> to TC<sub>C</sub>;  
430 near-synchronous propagation cascades were elicited in both the TRN and L4 layers of the model, having  
431 been stimulated by propagating activity in upstream TC neurons. Smooth, linear propagation of action  
432 potentials across the network depended on the synchronous induction of inhibitory postsynaptic potentials  
433 (IPSPs) and the ensuing post-inhibitory rebound spikes in TC neurons, which occurred reliably and at  
434 fixed intervals in Network a due to both its fully open-loop TC-TRN-TC connectivity and the absence of  
435 any synapses within the network's TRN layer. Relative to Network a, Network b was not capable of  
436 supporting activity propagation with the same fidelity, as predicted by the regression analyses.

437 Mechanistically, this was attributable to both the presence of strong TRN-TRN<sub>GABA</sub> synaptic connections,  
438 which reduced the incidence of IPSPs in TC neurons required for signal propagation across the network,  
439 and Network b's strong electrical coupling between TRN neurons, which destructively shunted a  
440 propagating signal away from the thalamoreticular lattice through which it predominantly traversed the  
441 network.

442  
443 Propagation and oscillation scores across all 770 homogeneous networks, as driven by a fixed, punctate  
444 stimulus, were strongly anticorrelated (Pearson's  $r=-0.739$ ,  $p<0.0001$ ). Accordingly, oscillation was best  
445 accommodated in network permutations exhibiting strongly closed-loop connectivity (Fig. 4A, bottom),  
446 as confirmed quantitatively through a linear regression model in which TC-TRN-TC openness was  
447 associated with an NRC of -1.000 ( $R^2=0.661$ ,  $RMSE=0.137$ ,  $p<0.0001$ ). This analysis furthermore  
448 demonstrated that both varieties of TRN-TRN synapse played nearly negligible roles in mediating or  
449 otherwise modulating oscillation, yielding NRCs of 0.058 and 0.064 for TRN-TRN<sub>GABA</sub> and TRN-  
450 TRN<sub>Elec</sub> synapses, respectively. The insignificant relationship between oscillation and the weights of  
451 intrareticular synapses was further reflected by the largely unpatterned distribution of oscillation scores in  
452 TRN-TRN<sub>GABA</sub> x TRN-TRN<sub>Elec</sub> phase space for the 70 fully closed-loop network variants (Fig. 4B, right).

453 No significant interactions or nonlinearities were disclosed through a second-order regression model  
454 relating oscillation to the three variable synaptic classes; indeed, this model was fully consistent with and  
455 only marginally more explanatory than its linear counterpart ( $R^2=0.687$ ,  $RMSE=0.137$ ,  $p<0.0001$ ; Table  
456 3). The mean oscillation score across network variants in this set of simulations was  $0.300 \pm 0.006$ , with  
457 scores ranging from 0.012 to 0.758.

458  
459 Although oscillation was observed in homogeneously synaptic networks driven by a fixed, punctate  
460 stimulus to  $TC_A$ , any oscillation in  $L4_C$  was judged to be generally unrelated to the fixed stimulus;  
461 equivalently stated, stimulus-induced oscillatory activity induced in  $L4_A$  did not propagate well through  
462 the network to  $L4_C$ . This deduction followed from the facts that 1) networks that supported robust  
463 oscillation (strongly closed-loop networks) did not facilitate strong signal propagation, and in particular,  
464 the propagation of oscillatory activity from one end of the network to the other and 2) the remaining  
465 synaptic motifs connecting adjacent columns in the network and potentially serving as substrates for  
466 signal propagation, namely those featuring a central intrareticular synapse, were demonstrated to exert  
467 generally negligible or weakly attenuating effects on network propagation and oscillation. In absence of  
468 stimulus-driven oscillatory activity propagating through the network, the default and indeed predominant  
469 mechanism by which oscillation arose in  $L4_C$  was through post-inhibitory rebound in  $TC_C$ , as engendered  
470 by the strong recurrent inhibition found in network permutations exhibiting primarily closed-loop TC-  
471 TRN-TC connectivity. This mechanism of oscillation was exemplified by Network c ([50, 0.18, 0]),  
472 which received an oscillation score of 0.690 (7<sup>th</sup> highest of 770 network permutations): as illustrated in a  
473 representative simulation of this network (Fig. 4C, right), an initial action potential in  $TC_C$ , elicited  
474 through a stochastic external input and notably in the absence of upstream oscillatory activity propagating  
475 through the network, drove recurrent inhibition in this neuron via  $TRN_C$ , causing oscillation in  $TC_C$  over  
476 several cycles and consequently driving concurrent oscillation in  $L4_C$ .

477

478 Based on the nature of oscillation in homogeneously synaptic network variants responding to a fixed,  
479 punctate stimulus, we speculate that the rate of network oscillation corresponded to the kinetics of the t-  
480 current, which underlies PIR. Across these simulations, oscillatory responses recurred linearly at mean  
481 intervals of  $109.27 \pm 0.31$  ms, or equivalently, at a mean frequency of  $9.15 \pm 0.02$  Hz.

482

### 483 *Response of homogeneously synaptic models to a fixed, sustained stimulus*

484 As was the case when homogeneously synaptic networks responded to a punctate external stimulus,  
485 homogeneous network responses to a fixed, sustained stimulus propagated in a linear manner, recurring in  
486 adjacent TC/L4 neurons at averaged fixed intervals of  $99.96 \pm 0.69$  ms and propagating at a velocity of  
487  $0.50$  mm/s. All networks variants driven by a fixed, sustained external stimulus to TC<sub>A</sub> were ranked  
488 separately according to their scores for each network property (Fig. 5A, top). Network permutations that  
489 allowed for robust propagative responses when TC<sub>A</sub> was stimulated in a punctate manner similarly  
490 supported such responses when external stimulation to TC<sub>A</sub> was sustained (linear regression,  $R^2=0.793$ ,  
491  $RMSE=0.047$ ,  $p<0.0001$ ). Propagation scores rose with increasing TC-TRN-TC openness ( $NRC=1.000$ ),  
492 while GABAergic and electrical TRN-TRN synapses both tended to exert moderate attenuating effects on  
493 network propagation ( $NRC=-0.173$  and  $NRC=-0.136$ , respectively). A second-order regression model  
494 ( $R^2=0.842$ ,  $RMSE=0.041$ ,  $p<0.0001$ ) disclosed qualitatively similar synaptic interactions when  
495 homogeneous networks were stimulated in a sustained manner as when they were driven by a punctate  
496 stimulus (Table 4). The one exception to this was an additional though small negative interaction between  
497 TRN-TRN<sub>GABA</sub> synapses and TC-TRN-TC openness ( $NRC=-0.152$ ). Both this negative interaction and  
498 the one between TRN-TRN<sub>Elec</sub> and TC-TRN-TC openness indicated that propagation was more  
499 significantly affected by connections in the TRN layer as a function of increasing open-loop TC-TRN-TC  
500 architecture; this is evident in Fig. 5B (left), as propagation scores conspicuously decrease in network  
501 variants with an OC of 1.0 as either chemical or electrical synapses increase in weight. The mean  
502 propagation score arising from sustained stimulation to TC<sub>A</sub> was  $0.633 \pm 0.006$ , with scores ranging from

503 0.414 to 0.961; these scores were not significantly different than those associated with fixed, punctate  
504 stimulation of the same network permutations [paired *t*-test,  $t(769)=1.067$ ,  $p=0.287$ ].

505

506 A simulation of Network d ([0,0.06,1]) illustrates typical signal propagation in a network permutation  
507 exhibiting high open-loop TC-TRN-TC connectivity and weak intrareticular synapses responding to a  
508 fixed, sustained stimulus delivered to TC<sub>A</sub> (Fig. 5C, left); its position as a function of propagation score is  
509 indicated in Figs. 5A (top) and 5B (left). The capacity of Network d to accommodate response  
510 propagation throughout the length of the network in response to sustained stimulation was  
511 mechanistically comparable to the similarly constituted Network a in the presence of punctate stimulation  
512 (see Fig. 4C), with the former earning a propagation score of 0.961, the highest score among all  
513 homogeneous network permutations exhibiting propagation as a function of fixed, sustained external  
514 stimulation.

515

516 Oscillatory responses in networks when subjected to fixed, sustained stimulation recurred linearly in L4<sub>C</sub>  
517 at mean intervals of  $110.26 \pm 0.25$  ms ( $9.07 \pm 0.02$  Hz). Propagation and oscillation scores across  
518 networks were similarly anticorrelated ( $r=-0.671$ ,  $p<0.0001$ ), though not as strongly as when TC<sub>A</sub> was  
519 stimulated in a fixed, punctate manner. While network permutations with stronger closed-loop TC-TRN-  
520 TC architectures were most permissive of cortical oscillation, this relationship was neither markedly  
521 linear nor monotonically decreasing as a function of increasing openness coefficient (linear regression,  
522  $R^2=0.526$ , RMSE=0.145,  $p<0.0001$ ; Table 4). Rather, a one-way ANOVA with Tukey's tests revealed  
523 that, on average, oscillation scores peaked and remained statistically indistinguishable from one another  
524 across the subset of network permutations with OCs between 0 and 0.4, with scores then decreasing in a  
525 roughly linear fashion with increasing TC-TRN-TC openness (Fig. 5D;  $F(10,759)=137.8$ ,  $p<0.0001$ ). This  
526 trend was partially accounted for in a second-order regression model ( $R^2=0.630$ , RMSE=0.129,  
527  $p<0.0001$ ), in which the quadratic term in TC-TRN-TC openness had an NRC of -1.000 and was thus the  
528 major determinant of network oscillation (all other synaptic variables in this model possessed NRCs with

529 absolute values less than 0.06). As with oscillation under the previous fixed stimulation condition, the  
530 inconsequential roles played collectively by TRN-TRN synapses in oscillation here were reflected by the  
531 haphazard distribution of scores in intrareticular synaptic parameter space (Fig. 5B, middle and right).  
532 The mean oscillation score of homogeneously synaptic networks subjected to fixed, sustained stimulation  
533 was  $0.369 \pm 0.006$  (scores ranged from 0.006 to 0.827), with networks exhibiting a greater oscillation  
534 score under this fixed stimulation condition than when stimulated in fixed, punctate manner [paired *t*-test,  
535  $t(769)=-13.345, p<0.0001$ ].

536  
537 We surmise that the discrepancy in network oscillation scores between homogeneous network variants  
538 excited in punctate and sustained manners owes to a mode of oscillation that, though still infrequently  
539 observed, became more prevalent in the latter set of simulations. Network permutations with somewhat  
540 stronger closed- than open-loop TC-TRN-TC connectivity (OCs=0.3 and 0.4), such as Network e  
541 ([100,0.12,0.4]; oscillation score, 0.662; rank, 21<sup>st</sup> of 770), were intermittently able to support the  
542 propagation of oscillatory activity from TC<sub>A</sub> to TC<sub>C</sub>, and thus between their downstream cortical  
543 counterparts, by virtue of 1) receiving sustained external input through TC<sub>A</sub> in a manner sufficient to elicit  
544 linearly recurring action potentials and 2) possessing sufficiently strong laterally inhibitory TRN-TC  
545 synapses to support propagation (Fig. 5C, middle). As previously mentioned, this mechanism for  
546 generating oscillation in L4<sub>C</sub> was comparatively rarer when the same subset of networks was stimulated  
547 in a fixed, punctate manner, as oscillation in TC<sub>A</sub> could not often be sustained without concurrent, high-  
548 frequency external stimulation. Network f ([450,0.36,0.2]) typified the still-dominant mode of oscillation  
549 exhibited in homogeneous networks stimulated in a punctate manner, namely that oscillation observed in  
550 strongly closed-loop networks deriving from PIR in TC<sub>C</sub> (Fig. 5C, right). In the selected simulation of this  
551 network, oscillatory activity was enabled by a single epoch of signal propagation, although Poisson-  
552 mediated external input to TC<sub>C</sub> remained the more common catalyst for this mode of oscillation. Notably,  
553 neither the presence of strong GABAergic nor electrical intrareticular synapses in Network f exerted

554 much effect on its ability to support oscillation (score, 0.726, 4<sup>th</sup> of 770), as predicted by the regression  
555 models.

556

557 *Response of heterogeneously synaptic models to a fixed, sustained stimulus*

558 Given both the number of individually varying synaptic parameters within heterogeneously synaptic  
559 networks (14, vs. 3 in the homogeneous networks) and the large number of heterogeneously synaptic  
560 network permutations simulated in this study (~12,600), we relied solely on regression analysis to  
561 ascertain the ultimate relationship between individual synaptic variables and network properties of  
562 interest; neither ranking network variants in order of performance nor examining specific parameter  
563 subspaces, as was done in the case of homogeneous networks, was practical. Accordingly, we constructed  
564 circuit-level schematics of linear regression models for propagation (Fig. 6A) and oscillation (Fig. 6B) as  
565 functions of the 14 synaptic variables in heterogeneous networks. While second-order regression models  
566 for both performance metrics were also generated, these models revealed only a small number of  
567 significant quadratic or interaction terms that could not more parsimoniously be accounted for by single  
568 synaptic variables in the corresponding linear regressions. We note any nonlinearities of interest here and  
569 report all regression results in Table 5.

570

571 The extent of stimulus-evoked response propagation in those heterogeneously synaptic networks  
572 generated increased chiefly as a function of increasing the strength of the more downstream of the two  
573 laterally inhibitory TRN-TC synapses,  $TRN_B \rightarrow TC_C$ : the corresponding term in a linear regression model  
574 of propagation ( $R^2=0.742$ ,  $RMSE=0.069$ ,  $p<0.0001$ ) possessed an NRC of 1.000 (Fig. 6A). Propagation  
575 scores, which averaged at  $0.601 \pm 0.001$  and ranged from 0.299 to 1.000, also scaled to a lesser extent  
576 with the more upstream laterally inhibitory reticulothalamic synapse,  $TRN_A \rightarrow TC_B$  (NRC=0.608). The  
577 two inhibitory intrareticular synapses originating at the rightmost end of the model network,  
578  $TRN_C \rightarrow TRN_A$  and  $TRN_C \rightarrow TRN_B$ , both exerted a small negative effect on propagation (NRC=-0.087 and  
579 NRC=-0.084, respectively). Additionally, two TRN- $TRN_{Elec}$  synapses,  $TRN_A = TRN_B$  and  $TRN_A = TRN_C$

580 (where the “=” denotes an electrical synapses), marginally decremented propagation in heterogeneous  
581 networks, with NRCs of -0.051 and -0.072, respectively. These findings clarified at an individual synaptic  
582 level the observation that strong TRN-TRN interactions, whether chemical or electrical, tended to impede  
583 signal propagation in homogeneous network variants. The three recurrently inhibitory synapses also  
584 decremented propagation efficiency to minor degrees, with  $\text{TRN}_C \rightarrow \text{TC}_C$ , which stood to interfere directly  
585 with  $\text{TC}_C$ 's reception of a propagating signal, associated with the largest NRC of these three synapses (-  
586 0.207; Table 5).

587  
588 A second-order regression model ( $R^2=0.857$ ,  $\text{RMSE}=0.051$ ,  $p<0.0001$ ) disclosed a large, propagation-  
589 enhancing interaction between the two laterally inhibitory synapses ( $\text{NRC}=0.753$ ), underscoring the same  
590 dependence of propagation on strong open-loop TC-TRN-TC connectivity as seen in homogeneously  
591 synaptic networks, but additionally demonstrating that propagation scores increased nonlinearly as a  
592 function of simultaneously increasing the weights of  $\text{TRN}_A \rightarrow \text{TC}_B$  and  $\text{TRN}_B \rightarrow \text{TC}_C$ . Quadratic terms  
593 elucidated by this model confirmed that nearly all of the synapses highlighted in the linear regression  
594 analysis retained the same qualitative effects on propagation over the domain of their weights, despite the  
595 magnitudes of those effects changing as a function of synaptic weight (Table 5); one exception to this was  
596  $\text{TRN}_C \rightarrow \text{TRN}_B$ , whose individual influence on propagation became negligibly positive at 450 nS.  
597 Interactions between TRN-TRN synapses of either variety and TRN-TC synapses tended diminish  
598 propagation, as did those between recurrent and lateral inhibitory TRN-TC synapses. Taken together, the  
599 linear and 2<sup>o</sup> regression models indicated that heterogeneous network permutations with strong laterally  
600 inhibitory TRN-TC synapses tended to best support propagation. We speculate that those synapses  
601 tending to diminish propagation, albeit all to a relatively small degree, shared in common the capacity to  
602 interfere with the precise spike timing required to propagate a signal continuously along the open-loop  
603 TC-TRN-TC subnetwork from  $L4_A$  to  $L4_C$ : in some cases, this interference would arise due to  
604 uncorrelated TRN-mediated inhibition of TC neurons (polysynaptically in the cases of  $\text{TRN}_A = \text{TRN}_B$  and  
605  $\text{TRN}_A = \text{TRN}_C$  and monosynaptically for  $\text{TRN}_A \rightarrow \text{TC}_A$ ,  $\text{TRN}_B \rightarrow \text{TC}_B$ , and  $\text{TRN}_C \rightarrow \text{TC}_C$ ) or in the case of  
606  $\text{TRN}_C \rightarrow \text{TRN}_A$  and  $\text{TRN}_C \rightarrow \text{TRN}_B$ , by disrupting the requisite TRN-driven PIR in the TC neurons.

607 Consistent response propagation across the length of the network was epitomized by Network a'  
608 (propagation score=0.868), in which  $TRN_A \rightarrow TC_B$  and  $TRN_B \rightarrow TC_C$  were both relatively strong and those  
609 synapses impeding propagation relatively weak (Fig. 6C, left).

610

611 Across the heterogeneously synaptic network permutations generated and analyzed, the mean oscillation  
612 score was  $0.438 \pm 0.001$ , with scores ranging between  $4 \times 10^{-4}$  and 1; there was a very small negative  
613 correlation between the propagation and oscillation scores of these networks ( $r=-0.0296$ ,  $p=0.0008$ ).

614 Although neither a linear ( $R^2=0.253$ ,  $RMSE=0.131$ ,  $p<0.0001$ ) nor a second-order ( $R^2=0.388$ ,  
615  $RMSE=0.118$ ,  $p<0.0001$ ) regression model accounted for a majority of the variability in oscillation scores  
616 across surveyed heterogeneous networks, each analysis nevertheless illuminated different aspects of this  
617 property's synaptic substrates. Linear regression analysis demonstrated that oscillation scores scaled  
618 positively with all three recurrently inhibitory TRN-TC synapses (Fig. 6B), mirroring the dependence of  
619 this network property on strong, global closed-loop TC-TRN-TC connectivity in homogeneously synaptic  
620 network variants. That the most downstream of these synapses,  $TRN_C \rightarrow TC_C$ , was strongly correlated with  
621 oscillation, with an NRC=1.000, corroborated the inferred role played by this synapse in generating what  
622 was the dominant mode of oscillation for homogeneous networks. Network b' (oscillation score, 0.508)  
623 was representative of a heterogeneous network variant in which this mechanism of oscillation was  
624 prevalent (Fig. 6C, middle). Two intrareticular synapses,  $TRN_A-TRN_C$  and  $TRN_A=TRN_C$ , tended to  
625 contribute modestly to oscillation (NRCs of 0.115 and 0.117, respectively), apparently representing  
626 alternate though nondominant pathways through which oscillatory activity might propagate from one end  
627 of the network to the other or be directly induced through successive bouts of PIR-mediated excitation in  
628  $TC_C$  via  $TRN_C$  (see Fig. 1B, left and middle pathways). By contrast, the two laterally inhibitory  
629 reticulothalamic synapses,  $TRN_A \rightarrow TC_B$  and  $TRN_B \rightarrow TC_C$ , tended to impede oscillation (NRCs of -0.289  
630 and -0.379, respectively).

631



632 Although a 2<sup>o</sup> regression analysis confirmed that  $TRN_A \rightarrow TC_B$  and  $TRN_B \rightarrow TC_C$  were, in their individual  
633 capacities, strongly anticorrelated with oscillation in heterogeneous networks (NRCs of -1.000 and -  
634 0.892, respectively), interaction terms in this model involving these two synapses and any of the three  
635 recurrently inhibitory TRN-TC synapses ( $TRN_A \rightarrow TC_A$ ,  $TRN_B \rightarrow TC_B$ ,  $TRN_C \rightarrow TC_C$ ) were moderately to  
636 strongly positive, with NRCs ranging between 0.345 and 0.669 (Table 5). Furthermore, in network  
637 permutations in which there was a continuum of strongly closed- and open-loop TC-TRN-TC motifs (i.e.,  
638 networks in which both varieties of TRN-TC synapse were strongly expressed, allowing oscillatory  
639 activity to propagate reliably towards  $TC_C/L4_C$ ), the cumulative oscillation-facilitating effects of these  
640 synaptic interactions superseded the attenuating, noninteractive effects of  $TRN_A \rightarrow TC_B$  and  $TRN_B \rightarrow TC_C$ .  
641 Indeed, some such heterogeneous networks, as typified by Network c' (oscillation score, 1.000; Fig. 6C,  
642 right), supported degrees of oscillation that exceeded those of top-performing homogeneous networks,  
643 whose synaptic uniformity precluded architectures in which both recurrently and laterally inhibitory  
644 TRN-TC synapses were maximally weighted. Other interactions, such as those between  $TRN_A \rightarrow TC_A$  and  
645 several intrareticular synapses, modestly hindered oscillation, apparently by diminishing the probability  
646 of periodically induced PIR in  $TC_A$  via  $TRN_A$  underlying oscillation in the former cell and the subsequent  
647 downstream propagation of this oscillatory activity; this interference could arise either from aperiodic  
648 inhibition of  $TRN_A$  ( $TRN_B \rightarrow TRN_A \times TRN_A \rightarrow TC_A$ , NRC=-0.186;  $TRN_C \rightarrow TRN_A \times TRN_A \rightarrow TC_A$ , NRC=-  
649 0.172) or through delaying/accelerating its spiking threshold via electrical coupling ( $TRN_A = TRN_C \times$   
650  $TRN_A \rightarrow TC_A$ , NRC=-0.114). Although there were fewer heterogeneous network variants simulated (or  
651 theoretically possible) that possessed a synaptic architecture capable of supporting the propagation of  
652 oscillation than networks in which oscillation was borne of PIR-mediated oscillation via  $TRN_C \rightarrow TC_C$ , the  
653 former mode of oscillation was more strongly correlated with high oscillation scores among these  
654 networks, the opposite of what was observed in homogeneous networks: this was evidenced by the  
655 relative magnitudes of the second-order regression NRC of  $TRN_C \rightarrow TC_C$  (0.107) and those of the synaptic  
656 interactions mediating propagation of oscillation.

657

658 *Comparisons of network properties across synaptic architecture and external stimulation groups*

659 We analyzed the relative capacities of homogeneously synaptic networks, whether stimulated externally  
660 in a fixed, punctate or sustained manner, and heterogeneous synaptic networks (for which  $TC_A$  was  
661 stimulated in a fixed, sustained manner) to support propagation and oscillation by comparing the 20  
662 highest scores achieved by homogeneous and heterogeneous network permutations with respect to each  
663 performance metric. We decided against performing a direct comparison of mean performance scores  
664 across the full sets of homogeneous network permutations and surveyed heterogeneous network variants  
665 due to both unequal sample sizes (770 homogeneous vs.  $\sim 12,600$  heterogeneous network permutations)  
666 and incomplete sampling of the full heterogeneous synaptic parameter space (less than 0.001% of all  
667 possible heterogeneously synaptic network variants were simulated in this study). As these caveats did  
668 not apply to the homogeneous networks alone, we were nevertheless able to employ repeated-measures  
669 comparisons of propagation and oscillation scores across the full set of 770 homogeneous network  
670 variants as a function of fixed stimulation condition (punctate vs. sustained) to more directly gauge the  
671 effect of different external stimulation durations on these network properties (see the *Response of*  
672 *homogeneously synaptic models to a fixed, sustained stimulus* subsection).

673  
674 A one-way ANOVA disclosed no significant differences in mean propagation scores between top-  
675 performing network permutations across any of the three synaptic/stimulation groups [ $F(2,57)=0.84$ ,  
676  $p=0.437$ ; Fig. 7]. We attributed this to the fact that synaptic regression analyses of both homogeneously  
677 and heterogeneously networks, regardless of the fixed, eternal stimulation condition imposed on the  
678 former, predicted that similarly constituted homogeneous and heterogeneous network variants, namely  
679 those with 1) fully open-loop TC-TRN-TC architectures (equivalently, those in which  $TRN_A \rightarrow TC_B$  and  
680  $TRN_B \rightarrow TC_C$  were maximally weighted) and 2) nonexistent intrareticular and recurrently inhibitory TRN-  
681 TC synapses, would rank among the top signal propagators. In contrast to propagation, the top scorers  
682 among heterogeneous network variants better supported oscillation than the top homogeneous performers,  
683 regardless of fixed stimulation condition [one-way ANOVA,  $F(2,57)=166.14$ ,  $p<0.0001$ ]. Pairwise mean  
684 oscillation differences assessed through Tukey's tests between top-performing heterogeneous networks  
685 and both groups of homogeneous networks were highly significant ( $p<0.0001$ ), while there was no

686 significant difference in top homogeneous oscillation scores as a function of differing fixed, external  
687 stimulation ( $p=0.153$ ). We concluded that heterogeneously synaptic networks' superior capacity to  
688 oscillate was most closely related to their greater relative ability to propagate oscillatory activity across  
689 TC-TRN-L4 columns; as related in the preceding section, this mode of oscillation, when available,  
690 yielded appreciably higher fidelity of oscillation than afforded by the effect of PIR-driven oscillation in  
691 TC<sub>C</sub>, itself predominant in homogeneous networks.

692

### 693 **Discussion:**

694 The data generated and analyzed in the present study confirmed our central hypothesis, that open-loop  
695 TC-TRN-TC synaptic motifs (Fig. 1B, right) could function as a substrate for signal propagation within  
696 the thalamus. Propagation scores were more strongly dependent on the more downstream of the two  
697 laterally inhibitory reticulothalamic synapses, TRN<sub>B</sub>→TC<sub>C</sub>, in heterogeneously synaptic networks. By  
698 contrast, not only was propagation poorly supported through intrareticular synapses, both chemical or  
699 electrical (Fig. 1B, left and middle, respectively), these pathways in fact generally interfered with the  
700 spike timing underlying propagation across the TC-TRN subnetwork; for the same reason, recurrently  
701 inhibitory TRN-TC synapses, which served no role in mediating signal propagation, also tended to  
702 diminish networks' capacity to support this property. Changing the duration of the generalized external  
703 stimulus delivered to networks from punctate (50 ms) to sustained (1,100 ms) did not significantly affect  
704 propagation scores across the set of homogeneously synaptic network permutations, nor were there  
705 differences observed between homogeneous and heterogeneous networks accommodating high degrees of  
706 propagation.

707

708 Oscillation in model networks typically arose through one of two mechanisms: the first, which was both  
709 more prevalent and strongly correlated with oscillation scores in homogeneous networks, relied on TRN<sub>C</sub>-  
710 mediated post-inhibitory rebound in TC<sub>C</sub> that recurred at periodic intervals and could be sustained over  
711 several hundred milliseconds. As such, this mode of oscillation was observed in networks exhibiting a  
712 strongly weighted TRN<sub>C</sub>→TC<sub>C</sub> synapse, whether individually, as in heterogeneous network variants, or as

713 part of homogeneous networks with a uniformly strong closed-loop TC-TRN-TC architecture. This  
714 mechanism could be elicited either indirectly through stimulation of the network upstream of TC<sub>C</sub>,  
715 including as a consequence of the fixed, external stimulus delivered to TC<sub>A</sub>, or directly through  
716 spontaneous external stimulation of the former neuron. Comparatively more robust oscillation, persisting  
717 over a greater number of cycles and consequently associated with higher oscillation scores, was observed  
718 as a result of the other mode of oscillation, which entailed the propagation of oscillatory activity, as  
719 induced through sustained stimulation of TC<sub>A</sub>, through a network. This oscillation mechanism was most  
720 likely to occur in networks exhibiting simultaneously strong closed- and open-loop TC-TRN-TC motifs  
721 and was therefore more prevalent in heterogeneous network permutations, where it was moreover more  
722 strongly determinative of oscillation scores than the other mode of oscillation. For this reason, the mean  
723 oscillation score of top-performing heterogeneous networks was significantly higher than those of their  
724 homogeneous counterparts; (across the full set of homogeneously synaptic networks, fixed, sustained  
725 stimulation slightly enhanced oscillation scores over those attained through punctate stimulation).  
726 Synaptic interactions that impeded the latter mode of oscillation typically interfered with the induction of  
727 oscillatory activity through PIR in TRN<sub>A</sub>→TC<sub>A</sub> by disrupting the temporal dynamics of this process and  
728 precluding this activity from propagating downstream. A third, relatively weak and infrequently observed  
729 form of oscillation also involved oscillatory activity propagating from one end of the network to the other  
730 by way of TRN<sub>A</sub>-TRN<sub>C</sub> and TRN<sub>A</sub>=TRN<sub>C</sub>.

731

### 732 *Methodological considerations of the study*

733 In an effort to maximize the predictive potential of our neural model relative to computational demands  
734 that can increase exponentially with increasing degrees of freedom, we relied in some instances on  
735 simplifications and/or idealizations, while in other cases, deliberately omitted experimentally verified  
736 biophysical and neurophysiological details of the thalamo-reticulo-cortical networks being simulated and  
737 their individual neuronal constituents. Such details can, in principle, can be selectively added to future  
738 iterations of this model to explore questions and phenomena related to those posed and examined in the  
739 present study.

740

741 Two points should be made regarding the constitution of the model neurons used in our study. First, like  
742 most of the thalamic (Destexhe et al., 1993; Destexhe et al., 1994; Golomb et al., 1996; Destexhe et al.,  
743 1996a; Sohal and Huguenard, 1998; Bazhenov et al., 1998) and thalamocortical models (Destexhe et al.,  
744 1998; Bazhenov et al., 2002; Rogala et al., 2013) that inspired our model, we utilized single-  
745 compartment, Hodgkin-Huxley neurons. While these model cells contribute to the computational  
746 parsimony and practicality of network models, particularly where the analysis of network dynamics is  
747 prioritized, they neglect the intrinsic cable properties of real neurons and, relatedly, the spatially disparate  
748 nature of synaptic integration and heterogeneous expression of intrinsic and synaptic conductances  
749 (Dayan and Abbott, 2005; Herz et al., 2006). Such considerations are particularly relevant here relative to  
750 dendritic distributions of t-current and h-current in TC neurons (McCormick and Pape, 1990; Destexhe et  
751 al., 1998; Williams and Stuart, 2000; Traub et al., 2005) and TRN neurons (Contreras et al., 1993;  
752 Destexhe et al., 1996b; Traub et al., 2005; Crandall et al., 2010). Multicompartment neuronal models  
753 incorporating such details could conceivably alter the network dynamics being studied. Second, although  
754 we allowed for heterogeneous connections within a given synaptic class for a subset of simulated network  
755 permutations, all cells within each of the three network layers were modeled with identical intrinsic  
756 parameters. In reality, even anatomically proximal populations of TC, TRN, and layer 4 cortical neurons  
757 each exhibit a wide spectrum of different intrinsic properties (Leresche et al., 1991; Spreafico et al., 1991;  
758 Lee et al., 2007; Landau et al., 2016), with the variability of these neurons' synaptic "footprints" in space  
759 often well exceeding what we capture in our model (Cox et al., 1996; Cox et al., 1997; Pinault et al.,  
760 1997). If larger-scale elaborations of the model are simulated in the future, both the cellular and spatial  
761 synaptic variability observed experimentally could be approximated by allowing given parameters to vary  
762 systematically or at random within physiological ranges, much as we did with TRN-TRN and TRN-TC  
763 synaptic conductances in the present study; this would allow any such model to approach a more  
764 representative degree of anatomical and functional heterogeneity.

765

766 In the interest of isolating the feedforward dynamics of thalamocortical transmission intrinsic to our  
767 present model, certain synaptic connections to TC, TRN, and L4 neurons were either excluded or  
768 generalized. First, while Poisson processes are often utilized to represent complex, noisy, and/or  
769 generalized synaptic inputs (Dayan and Abbott, 2005), it is reasonable, given the coherence of activity  
770 across anatomically disparate regions of the brain that prevails during sensory processing, that canonically  
771 non-sensory brain regions projecting to the both the TRN and dorsal thalamus might exhibit activity  
772 correlated with ascending sensory input, making the use of stochastic inputs to TC neurons of our model a  
773 crucially simplifying but imprecise approximation. Similarly, although the high-frequency pulse trains we  
774 employed as generalized external stimuli within the model belie the rich and variable stimulus encoding  
775 schemes inherent to different sensory systems, these rudimentary stimulus approximations, in  
776 combination with the baseline stochastic input, were nevertheless sufficient to elicit propagating and/or  
777 oscillating waves in the model network and analyze their dynamics across network permutations,  
778 reflecting the use of similar pulse trains to generate spindle-like waves in isolated thalamic slices and  
779 analysis of how those waves were perturbed as a function of various pharmacological manipulations (Bal  
780 et al., 1995; Kim et al., 1995). Although we chose not to emphasize the correlation between stimulus and  
781 response in the present study, in keeping with similar thalamo-reticulo(-cortical) modeling studies (e.g.,  
782 Destexhe et al., 1996a, Golomb et al., 1996; Sohal and Huguenard, 1998; Bazhenov et al., 1998, Traub et  
783 al., 2005), future efforts using the present baseline network model or elaborations thereof might  
784 investigate response dynamics as a function of varying spatial and/or temporal stimulus profiles (see, for  
785 example, Pham and Haas, 2018). A more realistic rendering of stimulus representations in this modeling  
786 paradigm might also account for the subset of inhibitory afferents projecting to parts of the thalamus,  
787 including the lateral geniculate nuclei and medial geniculate bodies (Cucchiaro et al., 1991; Winer et al,  
788 1996; Peruzzi et al., 1997; Llano et al., 2014).

789  
790 Additionally, the present model omitted explicit corticothalamic and corticoreticular synapses, both of  
791 which have been identified and physiologically characterized to varying degrees (Steriade et al., 1972;  
792 White and Hersch, 1982; DeCurtis et al., 1989; Contreras et al., 1996; Blumenfeld and McCormick, 2000;

793 Zhang and Jones, 2004; Crandall et al., 2015), though the former were effectively amalgamated with both  
794 feedforward sensory and modulatory projections to the thalamus in the form of the generalized, Poisson-  
795 modulated external input we delivered to individual TC neurons. Both forms of feedback have been  
796 implicated in the spread of spindle waves and in the maintenance of their synchronization over large  
797 distance scales (on the order of the length of the mammalian forebrain) and are furthermore known to  
798 drive spindle wave formation *in vivo* by polysynaptically recruiting TC neurons via TRN-mediated PIR  
799 (Steriade et al., 1972; Roy et al., 1984; Contreras and Steriade, 1996; Contreras et al., 1996; Suga and Ma,  
800 2003; Sillito et al., 2006; Crandall et al., 2015). It should be noted, however, that short-range coherence of  
801 spindle waves, which can be elicited in isolated thalamic slice preparations (Bal et al., 1995; Kim et al.,  
802 1995), is preserved following decortication, both *in vivo* and *in silico* (Contreras and Steriade, 1996;  
803 Contreras et al., 1996; Destexhe et al., 1998). By extension, it is reasonable to assume that the dynamics  
804 of the spindle-like waveforms generated in our small-scale, broadly feedforward model, in which the  
805 cortex served solely as an output layer, would not be qualitatively altered by corticothalamic or  
806 corticoreticular feedback. An additional challenge in modeling descending cortical projections lies in  
807 rendering the complex intracolumnar interactions between multiple cortical layers upstream of them:  
808 several thalamocortical models incorporating corticothalamic and corticoreticular feedback limited  
809 cortical representation to layer 6 neurons and/or fast-spiking interneurons (Destexhe et al., 1998;  
810 Bazhenov et al., 2002; Rogala et al., 2013), while Traub et al. (2005) simulated six distinct cortical  
811 populations within layers 2-6 as part of an expansive thalamocortical network model comprising 3,560  
812 multicompartments neurons. Future efforts within our modeling paradigm stand to both expand the spatial  
813 scale of the thalamocortical network and incorporate reciprocal cortical projections involving interactions  
814 between multiple cortical layers.

815

816 Finally, external inputs to the TRN were also omitted from the model. Although it is recognized that the  
817 TRN receives a variety of inputs from beyond the thalamus and sensory cortex (Asanuma and Porter,  
818 1990; Bickford et al., 1994; Zikopoulos and Barbas, 2006; Sun et al., 2013; Pita-Almenar et al., 2014), an  
819 early version of our model that included stochastic external inputs to TRN neurons mirroring those

820 delivered to the TC layer did not significantly alter network dynamics beyond marginally increasing  
821 variability in those network properties studied.

822

823 *Comparison to related computational models and physiological data*

824 Although the production of spindle waves was not an explicit objective of our study, some of the wave  
825 dynamics arising in our networks were nevertheless consistent with those inherent to spindle or spindle-  
826 like waves, as observed empirically or generated in other modeling studies. Despite possessing higher  
827 degrees of TC→TRN and TRN→TC synaptic divergence and lacking the exclusively open-loop TC-  
828 TRN-TC architecture characterizing a subset of our network variants, other isolated thalamic models  
829 allowing for longitudinal wave propagation similarly accommodated this propagation along the lattice of  
830 interconnected TC and TRN neurons by way of laterally inhibitory TRN-TC synapses (Kim et al., 1995;  
831 Destexhe et al., 1996a; Golomb et al., 1996; Bazhenov et al., 1998; Muller and Destexhe, 2012); at short  
832 ranges, this mechanism of signal propagation also prevailed in large-scale thalamo-reticulo-cortical  
833 models, while corticothalamics acted to propagate activity to more distal sites (Destexhe et al., 1998; see  
834 Destexhe and Sejnowski, 2003, for a schematic illustrating short- and long-range thalamocortical wave  
835 propagation). Comparably, recurrently inhibitory TRN-TC synapses have been documented to play a vital  
836 role in the generation of oscillatory behavior in the thalamus (Steriade and Deschênes, 1984; von Krosigk  
837 et al., 1993). The temporal parameters of propagating and oscillation signals in our model also matched  
838 some of those previously reported: among homogeneously synaptic network permutations, the mean  
839 velocity of signal propagation across the length of the network was approximately 0.50 mm/s, which was  
840 consistent with the propagation velocity of spindle waves measured in a ferret thalamic slice and about  
841 half as fast as values reported in computational models of this slice preparation (Kim et al., 1995; Golomb  
842 et al., 1996; Destexhe et al., 1996a). Similarly, the roughly 9.1-Hz mean oscillation frequency measured  
843 across homogeneous networks fell within the 6-12 Hz range of intraspindle spike frequencies reported in  
844 both physiological and computational spindle wave studies (Andersen and Andersson, 1968; Steriade and  
845 Deschênes, 1984; Kim et al., 1995; Golomb et al., 1996; Destexhe et al., 1996a).

846



847 Several key structural elements of our set of network models and the range of phenomenology they  
848 produced distinguish them from previous thalamic and thalamocortical models. One particularly notable  
849 point of departure relative to similar network models was the extent to which thalamoreticular,  
850 reticulothalamic, and thalamocortical synapses diverged. Although all three classes of synapses are  
851 known to diverge significantly and have been observed to target neuronal somata hundreds of microns  
852 from their origins (Jones, 1985; Crabtree, 1996; Cox et al., 1996; Cox et al., 1997; Pinault and Deschênes,  
853 1998; Sherman and Guillery, 2001; Alonso et al., 2001; Miller et al., 2001), the TC-TRN, TRN-TC, and  
854 TC-L4 synapses in our model were constrained to remain strictly local and minimally divergent (or non-  
855 divergent, in the case of TC-TRN and TC-L4 synapses). With respect to the first two classes of synapses,  
856 this constraint was imposed in order to preserve the disynaptic TC-TRN-TC open-loop motifs  
857 characterizing a subset of network permutations, which constituted one of the focuses of our study, and  
858 analyze the signal propagation they may support. This neuroanatomical scheme contrasted with previous  
859 computational models featuring parallel, interconnected thalamoreticular pathways, in which both TC and  
860 TRN synapsed bidirectionally with several neighboring TRN and TC cells, respectively, within a radius  
861 of several hundred microns (e.g., Golomb et al., 1996; Destexhe et al., 1996a; Destexhe et al., 1998; Sohal  
862 and Huguenard, 1998; Sohal et al., 2000; Bazhenov et al., 1998; Bazhenov et al., 2002; Traub et al., 2005;  
863 Izhikevich and Edelman, 2008).

864  
865 The contrasting synaptic architectures between our network model and other isolated thalamic models  
866 accounted for several important differences in the waveforms documented in this study and those  
867 previously observed *in simulo*. First, the asymmetric distribution of the laterally inhibitory TRN-TC  
868 synapses in our model generally restricted the propagation of signals to a single direction, whereas  
869 bidirectional wave propagation was observed in several other network models marked by greater degrees  
870 TC-TRN and TRN-TC synaptic divergence when these networks were externally stimulated in their  
871 anatomical centers (Bazhenov et al., 1998; Sohal et al., 2000). Relatedly, whereas some percentage of the  
872 stimulus-driven responses and spontaneous signals arising in Column A of our network tended to  
873 dissipate before arriving at Column C due to either spike failure or extraneous network activity interfering

874 with the temporal dynamics required for uninterrupted propagation (see, for example, Fig. 3, in which  
875 spikes associated with a single epoch of propagation that were tallied across simulations of the same  
876 network diminished between L4<sub>A</sub> and L4<sub>C</sub>), the presence of bidirectional, divergent thalamoreticular and  
877 reticulothalamic synapses in other network models were associated with less dampened, longer-duration,  
878 and in larger networks, longer-distance signal propagation, a property ostensibly attributable to the greater  
879 interconnectedness between TC and TRN neurons throughout these networks and a resulting degeneracy  
880 of signaling pathways (Destexhe et al., 1996a; Golomb et al., 1996; Bazhenov et al., 1998; Sohal and  
881 Huguenard, 1998).

882  
883 We emphasize, however, that the discrepancy in spatiotemporal signal coherence between our network  
884 model and others was also likely a function of disparate network inputs: on the one hand, fixed external  
885 input was applied periodically to certain networks (Destexhe et al., 1996a; Bazhenov et al., 1998; Rinzel  
886 et al., 1998), rather than over a singular interval as in ours, or distributed over multiple neurons in a  
887 spatially dependent manner (Bazhenov et al., 1998; Sohal et al., 2000; Pham and Haas, 2018), in contrast  
888 to the application of fixed stimulation to a single neuron (in our model, TC<sub>A</sub>). Arguably more integral to  
889 the difference in signal integrity was the stochastic input received by neurons in the TC layer of our  
890 model network: as detailed in our analysis, these inputs elicited sufficient noise to interfere intermittently  
891 with efficient propagation and oscillation. Other thalamic and thalamocortical model networks lacked  
892 these inputs, and indeed some remained fully quiescent in the absence of external stimulation (Destexhe  
893 et al., 1993; Golomb et al., 1996; Rinzel et al., 1998; Bazhenov et al., 1998; Sohal et al., 2000; Traub et  
894 al., 2005). We moreover ascribe the absence of the “waxing and waning” patterns of activation lasting  
895 0.5-2 s in TC, TRN, and cortical cell populations that characterize spindle waves, as measured  
896 experimentally in individual TC and TRN neurons (Steriade and Llinàs, 1988; Leresche et al., 1991;  
897 Soltesz et al., 1991; von Krosigk et al., 1993), observed across neuronal population through  
898 electroencephalography and local field potential recordings (Gibbs and Gibbs, 1950; Andersen and  
899 Andersson, 1968; Steriade and Deschênes, 1984; Steriade et al., 1987), and generated in network models  
900 aimed at reproducing the spindling phenomenon (Destexhe et al., 1993; Destexhe et al., 1994; Destexhe et

901 al., 1996a; Bazhenov et al. 1999), to the presence of stochastic activity in our model. Although the  
902 thalamic relay neurons in our model expressed the h-current and, in a subset of network permutations, the  
903 reciprocal TC-TRN connections thought to account for spindling, the phenomenon also presupposes a  
904 sustained antiphase relationship between TC and TRN spiking over the course of an individual spindle  
905 wave that was invariably disrupted by the stochastic input to our network (Destexhe et al., 1993; Bal and  
906 McCormick, 1996; Luthi and McCormick, 1998; Timofeev et al., 2001). That spindle waves still occur *in*  
907 *vivo* during sleep despite a myriad of inputs impinging on the dorsal thalamus and TRN that would tend  
908 to perturb the intrinsic and synaptic conductances underlying the waveform suggests a countervailing  
909 source of spindle maintenance: this role could conceivably be filled by corticothalamics, which have been  
910 demonstrated to synchronize spindle-wave activity over large distances in the brain (Bal et al., 1995;  
911 Contreras and Steriade, 1996; Timofeev et al., 2001; Bonjean et al., 2011).

912  
913 We finally wish to comment on the finding that intrareticular synapses, both GABAergic and electrical,  
914 manifested relatively little effect on the signal propagation and oscillation we observed in this study,  
915 despite having been copiously studied, simulated, and demonstrated to modulate certain waveforms  
916 arising in both the isolated thalamus and broader thalamocortical system (Ahlsén and Lindström, 1982;  
917 Steriade et al., 1990; Sanchez-Vives et al., 1997; Sohal et al., 2000; Landisman et al., 2002; Long et al.,  
918 2004; Fuentealba et al., 2004; Deleuze and Huguenard, 2006; Lam et al., 2006). To the extent that  
919 GABAergic intrareticular synapses disrupted efficient signal propagation along the length of our  
920 networks, this could conceivably lend credence to the contention of Deleuze and Huguenard (2006), who,  
921 based on their observation that TRN-TRN<sub>GABA</sub> synapses were more densely distributed along the  
922 dorsoventral (vertical) axis of the TRN, posited that these synapses may selectively filter sensory input as  
923 it traverses the thalamus to reach the cortex and play a less consequential role with respect to horizontal  
924 (intrathalamic) signal propagation. Notwithstanding the potentially paradigm-shifting question as to  
925 whether TRN-TRN<sub>GABA</sub> synapses are altogether absent in certain mammals or degenerate as a function of  
926 increasing age (Landisman et al., 2002; Cruikshank et al., 2010; Hou et al., 2016), it has moreover been  
927 shown in thalamic slice preparations derived from juvenile rodents, with supporting computational

928 models, that pharmacologically blocking or knocking out the expression of intrareticular GABAergic  
929 synapses promotes large-scale synchronization of ~3-Hz spike-wave discharges in the thalamus that  
930 resemble absence seizures; TRN-TRN<sub>GABA</sub> synapses are thus thought to desynchronize activity in a way  
931 that preserves normal thalamic function while staving off epileptiform patterns in affected animals (von  
932 Krosigk et al., 1993; Bal et al., 1995; Huntsman et al., 1999; Sohal et al., 2000; Sohal and Huguenard,  
933 2003; Traub et al., 2005). Although intrareticular synapses were shown in the present study to modestly  
934 dampen propagation through open-loop TC-TRN-TC architectures, both the relative lack of synaptic  
935 divergence, as discussed above, and the limited scale of our model network would have likely precluded  
936 any meaningful observations of neuronal synchrony or lack thereof as a function of TRN-TRN<sub>GABA</sub>  
937 weighting. It should additionally be stated that reticulothalamic signaling mediated through GABA<sub>B</sub>  
938 receptors is thought to contribute to the sustained hyperpolarization of thalamic relay neurons observed in  
939 absence-like waveforms, and these receptors were not included in our model (von Krosigk et al., 1993;  
940 Bal et al., 1995; Pinault et al., 1998; Crunelli and Leresche, 2002; Sohal and Huguenard, 2003).

941  
942 As was the case with chemical synapses in the TRN, TRN-TRN<sub>Elec</sub> synapses did not mediate signal  
943 propagation and supported comparatively weak forms of oscillation in a minority of network  
944 permutations. With respect to the former property, our results were consistent with predictions that follow  
945 from two sets of physiological observations made on these synapses: 1) across three separate studies,  
946 electrical postsynaptic potentials or “spikelets,” from which electrical coupling can be inferred, were  
947 observed in less than 50% of observed TRN neuron pairs [Landisman et al., 2002; Deleuze and  
948 Huguenard, 2006; Lam et al., 2006; Lee et al., 2014; note that Long et al. (2004) reported this figure at  
949 71% but speculated that the discrepancy owed to recording from cell pairs with <5 μm edge-edge  
950 separation]; and 2) mean electrical coupling coefficients between TRN neurons were small [0.032, as  
951 reported by Landisman et al. (2002); ~0.02, Fuentealba et al. (2004); 0.11, as measured in closely apposed  
952 cells by Long et al. (2004)]. These data suggest that 1) TRN-TRN<sub>Elec</sub> synapses are too sparsely distributed  
953 to facilitate uninterrupted signal propagation within the TRN over large scales and 2) electrical coupling  
954 between TRN neurons, even between those extremely closely situated to one another, is typically

955 insufficient to allow action potentials in one neuron to induce concurrent action potentials in its coupled  
956 partner. Indeed, we only observed direct electrical induction of action potentials in those network  
957 permutations exhibiting the highest degree of electrical coupling [0.36, close to the maximum coupling  
958 strength observed by Landisman et al. (2002) and Long et al. (2004); see the middle panel of Fig. 4C for  
959 an example of this phenomenon]. Nevertheless, gap junctions found between TRN neurons have been  
960 demonstrated to play important roles vis-à-vis thalamic signaling: in keeping with their ability to act as  
961 low-pass filters, TRN-TRN<sub>Elec</sub> synapses have been documented to promote thalamocortical  
962 synchronization of subthreshold activity and low-frequency oscillations (<10 Hz), including components  
963 of spindle waves (Long et al., 2004; Fuentealba et al., 2004; Traub et al., 2005), and can conceivably  
964 facilitate the temporal discrimination of multiple near-coincident sensory stimuli by the cortex (Pham and  
965 Haas, 2018). Furthermore, it has been suggested, based on the recent discovery of activity-dependent  
966 plasticity of electrical coupling strength in brain regions including the TRN (Haas et al., 2011; Haas and  
967 Landisman, 2012; Wang et al., 2015; Kohmann et al., 2016), that gap junction plasticity in the TRN might  
968 itself underlie the generation of spindle waves (Pernelle et al., 2017). It remains an outstanding question  
969 and one easily amenable to future investigation through computational modeling whether open-loop TC-  
970 TRN-TC architectures, either independently of or in cooperation with intrareticular synapses, modulate  
971 neuronal synchrony.

972

### 973 *The function and scale of open-loop thalamo-reticulo-thalamic synaptic motifs*

974 It is essential to contextualize the predictive potential of our model and the broader functions conceivably  
975 served by open-loop TC-TRN-TC architectures. As discussed, the networks designed for this study did  
976 not and were not intended to produce the gamut of phenomenology documented in the thalamocortical  
977 system. Rather, they function as idealized network modules that could hypothetically exist within  
978 surrounding neuronal populations. Open-loop TC-TRN-TC configurations have thus far been  
979 observed both within and across individual thalamic nuclei (both first- and higher-order) and are thought  
980 to serve as pathways for intra- and cross-modal modulation, respectively (Crabtree et al., 1998; Pinault  
981 and Deschênes, 1998; Crabtree and Isaac, 2002; Lam and Sherman, 2005; Lee et al., 2010; Kimura et al.,

982 2007; Kimura, 2014; Lam and Sherman, 2015). However, despite available data on the distances over  
983 which TRN neurons may project to synapse with TC cells (Cox et al., 1996), the proportion of recurrently  
984 to laterally inhibitory TRN-TC synapses in any thalamic nucleus and the spatial homogeneity of these  
985 connections remain unknown, and thus the density and distribution of open-loop TC-TRN-TC  
986 architectures are questions as yet unanswered; the full extent of open-loop connections between  
987 thalamic nuclei is similarly indeterminate. As such, our small network model could be easily rescaled to  
988 approximate the physiological dimensions of these connections as such information becomes available,  
989 adjusting synaptic delays accordingly.

990  
991 Although the anatomical bases of open-loop TC-TRN-TC motifs have been partially characterized,  
992 their functional significance in the brain lingers as a subject of continued speculation. As has been  
993 previously surmised, these synaptic pathways could plausibly lend themselves to sensory enhancement,  
994 multisensory integration, and attentional mechanisms (Crabtree and Isaac, 2002; Pinault, 2004; Willis et  
995 al., 2015; Crabtree, 2018). Whereas a full elucidation of such phenomena vis-à-vis thalamoreticular  
996 connectivity lies well beyond the scope of this study and will likely depend upon a far more nuanced  
997 understanding of how perceptual processes are born out of interplay between the cortex, dorsal thalamus,  
998 TRN, and likely other brain structures, our model can nevertheless offer more fundamental  
999 predictions about the capacity of open-loop TC-TRN-TC configurations to accommodate basic signaling  
1000 properties within the thalamus. First, as inferred from physiological studies, open-loop pathways should  
1001 be fully capable of supporting signaling propagation from one thalamic relay neuron to another through a  
1002 limited number of intervening synapses (with a disynaptic pathway serving as the shortest such  
1003 configuration), whether or not the target neuron lies in the same thalamic nucleus. Secondly, a localized  
1004 thalamic region consisting exclusively of interconnected open-loop TC-TRN-TC motifs (homogeneously  
1005 synaptic) or a sequence of spatially separated, interconnected laterally inhibitory TRN-TC synapses,  
1006 should either exist, might be capable of supporting a non-periodic signal (e.g., a transient sensory-evoked  
1007 signal) propagating between multiple thalamic relay neurons, subject to the nature of the signal, the  
1008 input(s) generating it, and potentially limited by the degree of spontaneous (decohering) activity along the

1009 signaling pathway. It is unclear how the fidelity of a transient signal in either scenario would compare to  
1010 that measured along a more densely interconnected segment of thalamus characterized by greater  
1011 thalamoreticular and reticulothalamic divergence, as traditionally conceived of in earlier modeling studies  
1012 (Destexhe et al., 1996a; Golomb et al., 1996; Bazhenov et al., 1998) and in which a signal might feed  
1013 back on itself; this is despite the fact that the latter architectures are capable of accommodating sustained,  
1014 periodic waveforms such as sleep spindles. Thirdly, discrete thalamic regions marked by synaptic  
1015 heterogeneity should be equally capable of propagating signals as those characterized by TC-TRN and  
1016 TRN-TC synaptic uniformity, after accounting for differences in the average weights or spatial densities of  
1017 laterally inhibitory TRN-TC synapses. Indeed, if the morphological, intrinsic, and synaptic heterogeneity  
1018 of TRN neurons are any indication (Schiebel and Schiebel, 1966; Jones, 1975; Spreafico et al., 1988;  
1019 Spreafico et al., 1991; Cox et al., 1996; Brunton and Charpak, 1997; Lee et al., 2007; Bickford, 2016), it  
1020 is reasonable to assume that both thalamoreticular and reticulothalamic synapses are typically distributed  
1021 in a heterogeneous manner across the thalamus. Lastly, unless driven by an external oscillatory source,  
1022 whether ascending or descending, oscillatory waveforms should not subsist in a localized thalamic region  
1023 populated exclusively by open-loop connections. Both forthcoming physiological investigation and future  
1024 modeling studies will undoubtedly be able to evaluate some of these predictions.

1025

#### 1026 **Acknowledgments:**

1027 This work made use of the Illinois Campus Cluster, a computing resource that is operated by the Illinois  
1028 Campus Cluster Program (ICCP) in conjunction with the National Center for Supercomputing  
1029 Applications (NCSA) and which is supported by funds from the University of Illinois at Urbana-  
1030 Champaign. We additionally thank Profs. Thomas Anastasio and Ruoqing Zhu, Drs. Rama Ratnam and  
1031 Baher Ibrahim, and Mr. Weddie Jackson for their valuable analytical, statistical, and technical insights.

1032

#### 1033 **References:**

- 1034 1. Smith PH, Bartlett EL, Kowalkowski A (2006) Unique combination of anatomy and  
1035 physiology in cells of the rat paralamina thalamic nuclei adjacent to the medial geniculate  
1036 body. *J Comp Neurol* 496(3):314-334.

- 1037  
1038  
1039  
1040  
1041  
1042  
1043  
1044  
1045  
1046  
1047  
1048  
1049  
1050  
1051  
1052  
1053  
1054  
1055  
1056  
1057  
1058  
1059  
1060  
1061  
1062  
1063  
1064  
1065  
1066  
1067  
1068  
1069  
1070  
1071  
1072  
1073  
1074  
1075  
1076  
1077  
1078  
1079  
1080  
1081  
1082  
1083  
1084  
1085  
1086  
1087  
1088  
1089
2. Lee SC, Cruikshank SJ, Connors BW (2010) Electrical and chemical synapses between relay neurons in developing thalamus. *J Physiol* 588(13):2403-2415.
  3. Guillery SW, Sherman SM (2002) Thalamic relay functions and their role in corticocortical communication: generalizations from the visual system. *Neuron* 33(2):163-175.
  4. Sherman SM (2004) Interneurons and triadic circuitry of the thalamus. *Trends Neurosci* 27(11):670-675.
  5. Pinault D (2004) The thalamic reticular nucleus: structure, function and concept. *Brain Res Brain Res Rev* 46(1):1-31.
  6. Crick F (1984) Function of the thalamic reticular complex: the searchlight hypothesis. *Proc Natl Acad Sci USA* 81(14):4586-4590.
  7. Guillery RW, Feig SL, Lozsádi DA (1998) Paying attention to the thalamic reticular nucleus. *Trends Neurosci* 21(1):28-32.
  8. McAlonan K, Cavanaugh J, Wurtz RH (2006) Attentional modulation of thalamic reticular neurons. *J Neurosci* 26(16):4444-4450.
  9. Llinás RR, Paré D (1991) Of dreaming and wakefulness. *Neuroscience* 44(3):521-535.
  10. Steriade M, McCormick D, Sejnowski T (1993) Thalamocortical oscillations in the sleeping and aroused brain. *Science* 262(5134):679-685.
  11. von Krosigk, M, Bal T, McCormick DA (1993) Cellular mechanisms of a synchronized oscillation in the thalamus. *Science* 261(5119):361-364.
  12. Bal T, von Krosigk M, McCormick DA (1995) Role of the ferret perigeniculate nucleus in the generation of synchronized oscillations in vitro. *J Physiol* 483(3):665-685.
  13. Destexhe A, Bal T, McCormick DA, Sejnowski TJ (1996) Ionic mechanisms underlying synchronized oscillations and propagating waves in a model of ferret thalamic slices. *J Neurophysiol* 76(3):2049-2070.
  14. Huguenard JR (1998) Neuronal circuitry of thalamocortical epilepsy and mechanisms of antiabsence drug action. *Adv Neurol* 79:991-999.
  15. McCormick DA, Contreras D (2001) On the cellular and network bases of epileptic seizures. *Annu Rev Physiol* 63:815-846.
  16. Wells MF, Wimmer RD, Schmitt LI, Feng G, Halassa MM (2016) Thalamic reticular impairment underlies attention deficit in Ptchd1(Y/-) mice. *Nature* 532(7597):58-63.
  17. Krol A, Wimmer RD, Halassa MM, Feng G (2018) Thalamic reticular dysfunction as a circuit endophenotype in neurodevelopmental disorders. *Neuron* 98(2):282-295.
  18. Sherman SM, Guillery RW (2001) Exploring the thalamus (Academic Press, San Diego).
  19. Steriade M, Deschênes M (1984) The thalamus as a neuronal oscillator. *Brain Res* 320(1):1-63.



- 1090  
1091  
1092  
1093  
1094  
1095  
1096  
1097  
1098  
1099  
1100  
1101  
1102  
1103  
1104  
1105  
1106  
1107  
1108  
1109  
1110  
1111  
1112  
1113  
1114  
1115  
1116  
1117  
1118  
1119  
1120  
1121  
1122  
1123  
1124  
1125  
1126  
1127  
1128  
1129  
1130  
1131  
1132  
1133  
1134  
1135  
1136  
1137  
1138  
1139  
1140  
1141  
1142
20. Steriade M, Domich L, Oakson G, Deschênes M (1987) The deafferented reticular thalamic nucleus generates spindle rhythmicity. *J Neurophysiol* 57(1):260-273.
  21. Kim U, Bal T, McCormick DA (1995) Spindle waves are propagating synchronized oscillations in the ferret LGNd in vitro. *J Neurophysiol* 74(3):1301-1323.
  22. Ulrich D, Huguenard, JR (1997) GABA(A)-receptor-mediated rebound burst firing and burst shunting in thalamus. *J Neurophysiol* 78(3):1748-1751.
  23. Hale PT, Sefton AJ, Bauer LA, Cottee LJ (1982) Interrelations of the rat's thalamic reticular and dorsal lateral geniculate nuclei. *Exp Brain Res* 45(1-2):217-229.
  24. Warren RA, Agmon A, Jones EG (1994) Oscillatory synaptic interactions between ventroposterior and reticular neurons in mouse thalamus in vitro. *J Neurophysiol* 72(4):1993-2003.
  25. Sherman SM, Guillery RW (1996) Functional organization of thalamocortical relays. *J Neurophysiol* 76(3):1367-1395.
  26. Shosaku A (1986) Cross-correlation analysis of a recurrent inhibitory circuit in the rat thalamus. *J Neurophysiol* 55(5):1030-1043.
  27. Lo FS, Sherman SM (1994) Feedback inhibition in the cat's lateral geniculate nucleus. *Exp Brain Res* 100(2):365-368.
  28. Gentet LJ, Ulrich D (2003) Strong, reliable and precise synaptic connections between thalamic relay cells and neurones of the nucleus reticularis in juvenile rats. *J Physiol* 546(3):801-811.
  29. Pinault D, Deschênes M (1998) Anatomical evidence for a mechanism of lateral inhibition in the rat thalamus. *Eur J Neurosci* 10(11):3462-3469.
  30. FitzGibbon T, Solomon SG, Goodchild AK (2000) Distribution of calbindin, parvalbumin, and calretinin immunoreactivity in the reticular thalamic nucleus of the marmoset: evidence for a medial leaflet of incertal neurons. *Exp Neurol* 164(2):371-383.
  31. Crabtree JW, Collingridge GL, Isaac JT (1998) A new intrathalamic pathway linking modality-related nuclei in the dorsal thalamus. *Nat Neurosci* 1(5):389-394.
  32. Crabtree JW, Isaac JT (2002) New intrathalamic pathways allowing modality-related and cross-modality switching in the dorsal thalamus. *J Neurosci* 22(19):8754-8761.
  33. Lam YW, Sherman SM (2005) Mapping by laser photostimulation of connections between the thalamic reticular and ventral posterior lateral nuclei in the rat. *J Neurophysiol* 94(4):2472-2483.
  34. Lam YW, Sherman SM (2015) Functional topographic organization of the motor reticulothalamic pathway. *J Neurophysiol* 113(9):3090-3097.
  35. Kimura A, Imbe H, Donishi T, Tamai Y (2007) Axonal projections of single auditory neurons in the thalamic reticular nucleus: implications for tonotopy-related gating function and cross-modal modulation. *Eur J Neurosci* 26(12):3524-3535.

- 1143  
1144  
1145  
1146  
1147  
1148  
1149  
1150  
1151  
1152  
1153  
1154  
1155  
1156  
1157  
1158  
1159  
1160  
1161  
1162  
1163  
1164  
1165  
1166  
1167  
1168  
1169  
1170  
1171  
1172  
1173  
1174  
1175  
1176  
1177  
1178  
1179  
1180  
1181  
1182  
1183  
1184  
1185  
1186  
1187  
1188  
1189  
1190  
1191  
1192  
1193  
1194  
1195
36. Kimura A (2014) Diverse subthreshold cross-modal sensory interactions in the thalamic reticular nucleus: implications for new pathways of cross-modal attentional gating function. *Eur J Neurosci* 39(9):1405-1418.
  37. Asanuma C, Porter LL (1990) Light and electron microscopic evidence for a GABAergic projection from the caudal basal forebrain to the thalamic reticular nucleus in rats. *J Comp Neurol* 302(1):159-172.
  38. Bickford ME, Günlük AE, Van Horn SC, Sherman SM (1994) GABAergic projection from the basal forebrain to the visual sector of the thalamic reticular nucleus in the cat. *J Comp Neurol* 348(4):481-510.
  39. Zikopoulos B, Barbas H (2006) Prefrontal projections to the thalamic reticular nucleus form a unique circuit for attentional mechanisms. *J Neurosci* 26(28):7348-7361.
  40. Sun YG, Pita-Almenar JD, Wu CS, Renger JJ, Uebele VN, Lu HC, Beierlein M (2013) Biphasic cholinergic synaptic transmission controls action potential activity in thalamic reticular nucleus neurons. *J Neurosci* 33(5):2048–2059.
  41. Pita-Almenar JD, Yu D, Lu HC, Beierlein M (2014) Mechanisms underlying desynchronization of cholinergic-evoked thalamic network activity. *J Neurosci* 34(43):14463–14474.
  42. Destexhe A, McCormick DA, Sejnowski TJ (1993) A model for 8–10 Hz spindling in interconnected thalamic relay and reticularis neurons. *Biophys J* 65(6):2473–2477.
  43. Destexhe A, Contreras D, Sejnowski TJ, Steriade M (1994) A model of spindle rhythmicity in the isolated thalamic reticular nucleus. *J Neurophysiol* 72(2):803–818.
  44. Golomb D, Wang XJ, Rinzel J (1996) Propagation of spindle waves in a thalamic slice model. *J Neurophysiol* 75(2):750-769.
  45. Sohal VS, Huguenard JR (1998) Long-Range Connections Synchronize Rather Than Spread Intrathalamic Oscillations: Computational Modeling and In Vitro Electrophysiology. *J Neurophysiol* 80(4):1736-1751.
  46. Bazhenov M, Timofeev I, Steriade M, Sejnowski TJ (1998) Computational models of thalamocortical augmenting responses. *J Neurosci* 18(16):6444-6465.
  47. Wasylenko TM, Cisternas JE, Laing CR, Kevrekidis IG (2010) Bifurcations of lurching waves in a thalamic neuronal network. *Biol Cybern* 103(6):447-62.
  48. Pham T, Haas JS (2018) Electrical synapses between inhibitory neurons shape the responses of principal neurons to transient inputs in the thalamus: a modeling study. *Sci Rep* 8(1):7763.
  49. Destexhe A, Contreras D, Steriade M (1998) Mechanisms underlying the synchronizing action of corticothalamic feedback through inhibition of thalamic relay cells. *J Neurophysiol* 79(2):999–1016.
  50. Bazhenov M, Timofeev I, Steriade M, Sejnowski TJ (2002) Model of thalamocortical slow-wave sleep oscillations and transitions to activated states. *J Neurosci* 22(19):8691–8704.

- 1196  
1197  
1198  
1199  
1200  
1201  
1202  
1203  
1204  
1205  
1206  
1207  
1208  
1209  
1210  
1211  
1212  
1213  
1214  
1215  
1216  
1217  
1218  
1219  
1220  
1221  
1222  
1223  
1224  
1225  
1226  
1227  
1228  
1229  
1230  
1231  
1232  
1233  
1234  
1235  
1236  
1237  
1238  
1239  
1240  
1241  
1242  
1243  
1244  
1245  
1246
51. Traub RD, Contreras D, Cunningham MO, Murray H, LeBeau FE, Roopun A, Bibbig A, Wilentz WB, Higley MJ, Whittington MA (2005) Single-column thalamocortical network model exhibiting gamma oscillations, sleep spindles, and epileptogenic bursts. *J Neurophysiol* 93(4):2194-2232.
  52. Izhikevich EM, Edelman GM (2008) Large-scale model of mammalian thalamocortical systems. *Proc Natl Acad Sci USA* 105(9):3593-8.
  53. Rogala J, Waleszczyk WJ, Lęski S, Wróbel A, Wójcik DK (2013) Reciprocal inhibition and slow calcium decay in perigeniculate interneurons explain changes of spontaneous firing of thalamic cells caused by cortical inactivation. *J Comput Neurosci* 34(3):461-476.
  54. Willis AM, Slater BJ, Gribkova ED, Llano DA (2015) Open-loop organization of thalamic reticular nucleus and dorsal thalamus: a computational model. *J Neurophysiol* 114(4):2353-2367.
  55. Sherman SM (2001) Tonic and burst firing: dual modes of thalamocortical relay. *Trends Neurosci* 24(2):122-126.
  56. Halassa MM, Siegle JH, Ritt JT, Ting JT, Feng G, Moore CI (2011) Selective optical drive of thalamic reticular nucleus generates thalamic bursts and cortical spindles. *Nat Neurosci* 14(9):1118-1120.
  57. Ahlsén, G, Lindström, S (1982) Mutual inhibition between perigeniculate neurones. *Brain Res* 236(2):482-486.
  58. Steriade M, Jones EG, Llinás RR (1990) *Thalamic Oscillations and Signaling* (Wiley-Interscience, New York).
  59. Cox CL, Huguenard JR, Prince DA (1996) Heterogeneous axonal arborizations of rat thalamic reticular neurons in the ventrobasal nucleus. *J Comp Neuro* 366(3):416-430.
  60. Sanchez-Vives, MV, Bal T, McCormick DA (1997) Inhibitory interactions between perigeniculate GABAergic neurons. *J Neurosci* 17(22):8894-8908.
  61. Shu Y, McCormick DA (2002) Inhibitory interactions between ferret thalamic reticular neurons. *J Neurophysiol* 87(5):2571-2576.
  62. Deleuze C, Huguenard (2006) Distinct electrical and chemical connectivity maps in the thalamic reticular nucleus: potential roles in synchronization and sensation. *J Neurosci* 26(33):8633-8645.
  63. Lam, YW, Nelson CS, Sherman SM (2006) Mapping of the functional interconnections between thalamic reticular neurons using photostimulation. *J Neurophysiol* 96(5):2593-2600.
  64. Landisman CE, Long MA, Beierlein M, Deans MR, Paul DL, Connors BW (2002) Electrical synapses in the thalamic reticular nucleus. *J Neurosci* 22(3):1002-1009.
  65. Long MA, Landisman CE, Connors BW (2004) Small clusters of electrically coupled neurons generate synchronous rhythms in the thalamic reticular nucleus. *J Neurosci* 24(2):341-349.

- 1247 66. Fuentealba P, Crochet S, Timofeev I, Bazhenov M, Sejnowski TJ, Steriade M (2004)  
1248 Experimental evidence and modeling studies support a synchronizing role for electrical  
1249 coupling in the cat thalamic reticular neurons in vivo. *Eur J Neurosci* 20(1):111-9.  
1250
- 1251 67. Deleuze C, David F, Béhuret S, Sadoc G, Shin HS, Uebele VN, Renger JJ, Lambert RC,  
1252 Leresche N, Bal T (2012) T-type calcium channels consolidate tonic action potential output  
1253 of thalamic neurons to neocortex. *J Neurosci* 32(35):12228–12236.  
1254
- 1255 68. Pospischil M, Toledo-Rodriguez M, Monier C, Piwkowska Z, Bal T, Frégnac Y, Markram H,  
1256 Destexhe A (2008) Minimal Hodgkin-Huxley type models for different classes of cortical and  
1257 thalamic neurons. *Biol Cybern* 99(4-5):427–441.  
1258
- 1259 69. Yamada WM, Koch C, Adams PR (1989) Multiple channels and calcium dynamics. *Methods*  
1260 *in Neuronal Modeling*, eds Koch C, Segev I (MIT Press, Cambridge, MA), pp 97–133.  
1261
- 1262 70. Tsodyks MV, Markram H (1997) The neural code between neocortical pyramidal neurons  
1263 depends on neurotransmitter release probability. *Proc Natl Acad Sci USA* 94(2):719–723.  
1264
- 1265 71. Tsodyks MV, Pawelzik K, Markram H (1998) Neural networks with dynamic synapses.  
1266 *Neural Comput* 10(4):821-835.  
1267
- 1268 72. Pinault D, Smith Y, Deschênes M (1997) Dendrodendritic and axoaxonic synapses in the  
1269 thalamic reticular nucleus of the adult rat. *J Neurosci* 17(9):3215-3233.  
1270
- 1271 73. Cruikshank SJ, Urabe H, Nurmikko AV, Connors BW (2010) Pathway-specific feedforward  
1272 circuits between thalamus and neocortex revealed by selective optical stimulation of axons.  
1273 *Neuron* 65(2):230-45.  
1274
- 1275 74. Hou G, Smith AG, Zhang ZW (2016) Lack of Intrinsic GABAergic Connections in the  
1276 Thalamic Reticular Nucleus of the Mouse. *J Neurosci* 36(27):7246-7252.  
1277
- 1278 75. Dayan P, Abbott LF (2005) *Theoretical Neuroscience*, revised edition (MIT Press,  
1279 Cambridge, MA).  
1280
- 1281 76. Shimizu K, Stopfer M (2013) Gap junction. *Curr Biol* 23(23):R1026-1031.  
1282
- 1283 77. Chen C, Regehr WG (2003) Presynaptic modulation of the retinogeniculate synapse. *J*  
1284 *Neurosci* 23(8):3130–3135.  
1285
- 1286 78. Siegel A, Sapru HN (2015) *Essential Neuroscience*, Third Edition (Lippincott Williams &  
1287 Wilkins, Baltimore).  
1288
- 1289 79. Jones EG (1975) Some aspects of the organization of the thalamic reticular complex. *J Comp*  
1290 *Neurol* 162(3):285-308.  
1291
- 1292 80. Sohal VS, Huntsman MM, Huguenard JR (2000) Reciprocal inhibitory connections regulate  
1293 the spatiotemporal properties of intrathalamic oscillations. *J Neurosci* 20(5):1735-1745.  
1294
- 1295 81. Crabtree JW (1996) Organization in the somatosensory sector of the cat's thalamic reticular  
1296 nucleus. *J Comp Neurol* 366(2):207-222.  
1297
- 1298 82. Cox CL, Huguenard JR, Prince DA (1997) Nucleus reticularis neurons mediate diverse  
1299 inhibitory effects in thalamus. *Proc Natl Acad Sci USA* 94(16):8854-8859.

- 1300  
1301  
1302  
1303  
1304  
1305  
1306  
1307  
1308  
1309  
1310  
1311  
1312  
1313  
1314  
1315  
1316  
1317  
1318  
1319  
1320  
1321  
1322  
1323  
1324  
1325  
1326  
1327  
1328  
1329  
1330  
1331  
1332  
1333  
1334  
1335  
1336  
1337  
1338  
1339  
1340  
1341  
1342  
1343  
1344  
1345  
1346  
1347  
1348  
1349  
1350  
1351  
1352
83. Moore JW, Ramon F (1974) On numerical integration of the Hodgkin and Huxley equations for a membrane action potential. *J Theor Biol* 45(1):249–273.
  84. R Core Team (2013) R: A language and environment for statistical computing (R Foundation for Statistical Computing, Vienna). URL <http://www.R-project.org/>.
  85. Friedman J, Hastie J, Tibshirani R (2010) Regularization paths for generalized linear models via coordinate descent. *J Stat Softw* 33(1):1-22.
  86. Herz AV, Gollisch T, Machens CK, Jaeger D (2006) Modeling single-neuron dynamics and computations: a balance of detail and abstraction. *Science* 314(5796):80-5.
  87. McCormick DA, Pape HC (1980) Properties of a hyperpolarization-activated cation current and its role in rhythmic oscillation in thalamic relay neurones. *J Physiol (Lond)* 431:291-318.
  88. Williams SR, Stuart GJ (2000) Action potential backpropagation and somato-dendritic distribution of ion channels in thalamocortical neurons. *J Neurosci* 20(4):1307-17.
  89. Contreras D, Curró Dossi R, Steriade, M (1993) Electrophysiological properties of cat reticular thalamic neurones in vivo. *J Physiol* 470:273-94.
  90. Destexhe A, Contreras D, Steriade M, Sejnowski TJ, Huguenard JR (1996) In vivo, in vitro, and computational analysis of dendritic calcium currents in thalamic reticular neurons. *J Neurosci* 16(1):169-85.
  91. Crandall SR, Govindaiah G, Cox CL (2010) Low-threshold  $Ca^{2+}$  current amplifies distal dendritic signaling in thalamic reticular neurons. *J Neurosci* 30(46):15419-29.
  92. Leresche N, Lightowler S, Soltesz I, Jassik-Gerschenfeld D, Crunelli V (1991) Low-frequency oscillatory activities intrinsic to rat and cat thalamocortical cells. *J Physiol* 441:155-74.
  93. Spreafico R, Battaglia G, Frassoni C (1991) The reticular thalamic nucleus (RTN) of the rat: cytoarchitectural, Golgi, immunocytochemical, and horseradish peroxidase study. *J Comp Neurol* 304(3):478-90.
  94. Lee SH, Govindaiah G, Cox CL (2007) Heterogeneity of firing properties among rat thalamic reticular nucleus neurons. *J Physiol (Lond)* 582(1):195-208.
  95. Landau, ID, Egger R, Dercksen VJ, Oberlaender M, Sompolinsky H (2016) The impact of structural heterogeneity on excitation-inhibition balance in cortical networks. *Neuron* 92(5):1106-1121.
  96. Cucchiaro JB, Bickford ME, Sherman SM (1991) A GABAergic projection from the pretectum to the dorsal lateral geniculate nucleus in the cat. *Neuroscience* 41(1):213-26.
  97. Winer JA, Saint Marie RL, Larue DT, Oliver DL (1996) GABAergic feedforward projections from the inferior colliculus to the medial geniculate body. *Proc Natl Acad Sci USA* 93:8005–10.
  98. Peruzzi D, Bartlett E, Smith PH, Oliver DL (1997) A monosynaptic GABAergic input from the inferior colliculus to the medial geniculate body in rat. *J Neurosci* 17:3766–77.

- 1353  
1354  
1355  
1356  
1357  
1358  
1359  
1360  
1361  
1362  
1363  
1364  
1365  
1366  
1367  
1368  
1369  
1370  
1371  
1372  
1373  
1374  
1375  
1376  
1377  
1378  
1379  
1380  
1381  
1382  
1383  
1384  
1385  
1386  
1387  
1388  
1389  
1390  
1391  
1392  
1393  
1394  
1395  
1396  
1397  
1398  
1399  
1400  
1401  
1402  
1403  
1404
99. Llano DA, Slater BJ, Lesicko AM, Stebbings KA (2014) An auditory colliculo-thalamocortical brain slice preparation in mouse. *J Neurophysiol* 111:197–207.
  100. Steriade M, Wyzinski P, Apostol V (1972) Corticofugal projections governing rhythmic thalamic activity. *Corticothalamic Projections and Sensorimotor Activities*, eds Frigyesi TL, Rinvik E, Yahr MD (Raven, New York), pp 221–72.
  101. White EL, Hersch SM (1982) A quantitative study of thalamocortical and other synapses involving the apical dendrites of corticothalamic projection cells in mouse SmI cortex. *J Neurocytol* 11(1):137-57.
  102. De Curtis M, Spreafico R, Avanzini G (1989) Excitatory amino acids mediate responses elicited in vitro by stimulation of cortical afferents to reticularis thalami neurons of the rat. *Neuroscience* 33(2):275-83.
  103. Contreras D, Destexhe A, Sejnowski TJ, Steriade M (1996) Control of spatiotemporal coherence of a thalamic oscillation by corticothalamic feedback. *Science* 274(5288):771-4.
  104. Blumenfeld H, McCormick DA (2000) Corticothalamic inputs control the pattern of activity generated in thalamocortical networks. *J Neurosci* 20(13):5153-62.
  105. Zhang L, Jones EG (2004) Corticothalamic inhibition in the thalamic reticular nucleus. *J Neurophysiol* 91(2):759-66.
  106. Crandall SR, Cruikshank SJ, Connors BW (2015) A corticothalamic switch: controlling the thalamus with dynamic synapses. *Neuron* 86(3):768-82.
  107. Roy JP, Clercq M, Steriade M, Deschênes M (1984) Electrophysiology of neurons of lateral thalamic nuclei in cat: mechanisms of long-lasting hyperpolarizations. *J Neurophysiol* 51(6):1220-35.
  108. Contreras D, Steriade M (1996) Spindle oscillation in cats: the role of corticothalamic feedback in a thalamically generated rhythm. *J Physiol* 490(1):159-179.
  109. Suga N, Ma X (2003) Multiparametric corticofugal modulation and plasticity in the auditory system. *Nat Rev Neurosci* 4(10):783-94.
  110. Sillito AM, Cudeiro J, Jones HE (2006) Always returning: feedback and sensory processing in visual cortex and thalamus. *Trends Neurosci* 29(6):307-16.
  111. Muller L, Destexhe A (2012) Propagating waves in thalamus, cortex and the thalamocortical system: Experiments and models. *J Physiol Paris* 106(5-6):222-38.
  112. Destexhe A, Sejnowski TJ (2003) Interactions between membrane conductances underlying thalamocortical slow-wave oscillations. *Physiol Rev* 83(4):1401-53.
  113. Andersen P, Andersson SA (1968) *The physiological basis of the alpha rhythm* (Appleton-Century-Crofts, New York).
  114. Jones EG (1985) *The Thalamus* (Plenum Press, New York).

- 1405 115. Alonso JM, Usrey WM, Reid RC (2001) Rules of connectivity between geniculate cells and  
1406 simple cells in cat primary visual cortex. *J Neurosci* 21(11):4002-15.  
1407
- 1408 116. Miller LM, Escabí MA, Read HL, Schreiner CE (2001) Functional convergence of response  
1409 properties in the auditory thalamocortical system. *Neuron* 32(1):151-60.  
1410
- 1411 117. Rinzel J, Terman D, Wang X, Ermentrout B (1998) Propagating activity patterns in large-  
1412 scale inhibitory neuronal networks. *Science* 279(5355):1351-5.  
1413
- 1414 118. Steriade M, Llinás RR (1988) The functional states of the thalamus and the associated  
1415 neuronal interplay. *Physiol Rev* 68(3):649-742.  
1416
- 1417 119. Soltesz I, Lightowler S, Leresche N, Jassik-Gerschenfeld D, Pollard CE, Crunelli V (1991)  
1418 Two inward currents and the transformation of low-frequency oscillations of rat and cat  
1419 thalamocortical cells. *J Physiol (Lond)* 441:175-97.  
1420
- 1421 120. Gibbs FA, Gibbs EL (1950) Atlas of Electroencephalography, volume one (Addison-Wesley,  
1422 Cambridge, MA)  
1423
- 1424 121. Bazhenov M, Timofeev I, Steriade M, Sejnowski TJ (1999) Self-sustained rhythmic activity  
1425 in the thalamic reticular nucleus mediated by depolarizing GABA<sub>A</sub> receptor potentials. *Nat*  
1426 *Neurosci* 2(2):168-74.  
1427
- 1428 122. Bal T, McCormick DA (1996) What stops synchronized thalamocortical oscillations? *Neuron*  
1429 17(2):297-308.  
1430
- 1431 123. Lüthi A, McCormick DA (1998) Periodicity of thalamic synchronized oscillations: the role of  
1432 Ca<sup>2+</sup>-mediated upregulation of I<sub>h</sub>. *Neuron* 20(3):553-63.  
1433
- 1434 124. Timofeev I, Bazhenov M, Sejnowski TJ, Steriade M (2001) Contribution of intrinsic and  
1435 synaptic factors in the desynchronization of thalamic oscillatory activity. *Thalamus Relat Syst*  
1436 1(1):53-69.  
1437
- 1438 125. Bonjean M, Baker T, Lemieux M, Timofeev I, Sejnowski T, Bazhenov M (2011)  
1439 Corticothalamic feedback controls sleep spindle duration in vivo. *J Neurosci* 31(25):9124-34.  
1440
- 1441 126. Huntsman MM, Porcello DM, Homanics GE, Delorey TM, Huguenard JR (1999) Reciprocal  
1442 inhibitory connections and network synchrony in the mammalian thalamus. *Science*  
1443 283(5401):541-3.  
1444
- 1445 127. Sohal VS, Huguenard JR (2003) Inhibitory interconnections control burst pattern and  
1446 emergent network synchrony in reticular thalamus. *J Neurosci* 23(26):8978-88.  
1447
- 1448 128. Crunelli V, Leresche N (2002) Childhood absence epilepsy: genes, channels, neurons and  
1449 networks. *Nat Rev Neurosci* 3(5):371-82.  
1450
- 1451 129. Lee SC, Patrick SL, Richardson, KA, Connors, BW (2014) Two functionally distinct  
1452 networks of gap junction-coupled inhibitory neurons in the thalamic reticular nucleus. *J*  
1453 *Neurosci* 34(39):13170-82.  
1454
- 1455 130. Haas JS, Zavala B, Landisman CE (2011) Activity-dependent long-term depression of  
1456 electrical synapses. *Science* 334(6054):389-93.  
1457

- 1458 131. Haas JS, Landisman CE (2012) State-dependent modulation of gap junction signaling by the  
1459 persistent sodium current. *Front Cell Neurosci* 5:31. doi:10.3389/fncel.2011.00031  
1460
- 1461 132. Wang Z, Neely R, Landisman CE (2015) Activation of group I and group II metabotropic  
1462 glutamate receptors causes LTD and LTP of electrical synapses in the rat thalamic reticular  
1463 nucleus. *J Neurosci* 35(19):7616-25.  
1464
- 1465 133. Kohmann D, Lüttjohann A, Seidenbecher T, Coulon P, Pape HC (2016) Short-term  
1466 depression of gap junctional coupling in reticular thalamic neurons of absence epileptic rats. *J*  
1467 *Physiol (Lond)* 594(19):5695-710.  
1468
- 1469 134. Pernelle G, Nicola W, Clopath C (2017) Gap junction plasticity can lead to spindle  
1470 oscillations. [arXiv:1710.03999](https://arxiv.org/abs/1710.03999) [q-bio.NC]  
1471
- 1472 135. Crabtree JW (2018) Functional Diversity of Thalamic Reticular Subnetworks. *Front Syst*  
1473 *Neurosci* 12:41. doi:10.3389/fnsys.2018.00041  
1474
- 1475 136. Scheibel ME, Scheibel AB (1966) The organization of the nucleus reticularis thalami: a Golgi  
1476 study. *Brain Res* 1(1):43-62.  
1477
- 1478 137. Spreafico R, De Curtis M, Frassoni C, Avanzini G (1988) Electrophysiological characteristics  
1479 of morphologically identified reticular thalamic neurons from rat slices. *Neuroscience*  
1480 27(2):629-38.  
1481
- 1482 138. Brunton J, Charpak S (1997) Heterogeneity of cell firing properties and opioid sensitivity in  
1483 the thalamic reticular nucleus. *Neuroscience* 78(2):303-7.  
1484
- 1485 139. Bickford ME (2016) Thalamic Circuit Diversity: Modulation of the Driver/Modulator  
1486 Framework. *Front Neural Circuits* 9:86. doi: 10.3389/fncir.2015.00086  
1487

1488

1489

1490

1491

1492

1493

1494

1495

1496

1497

1498



1499 **Figures:**

**A**

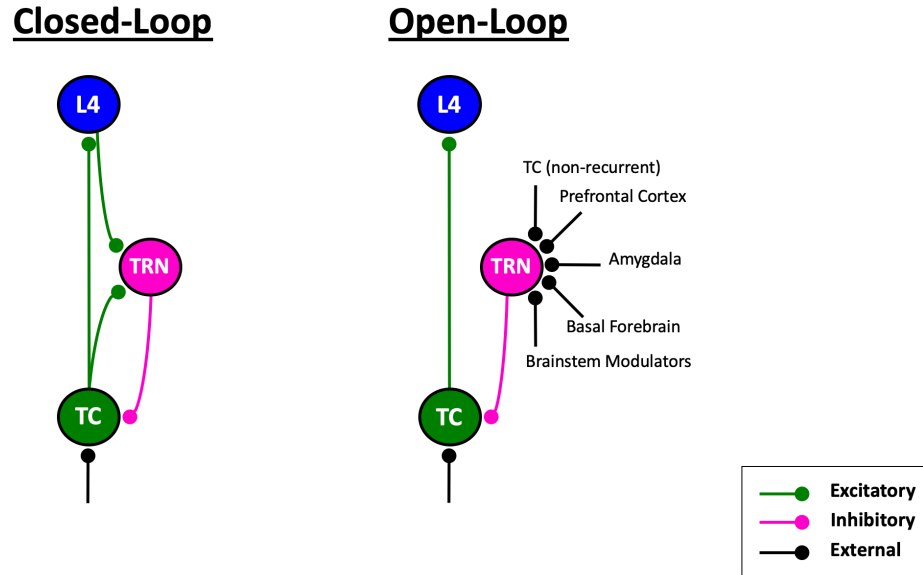

1500

**B**

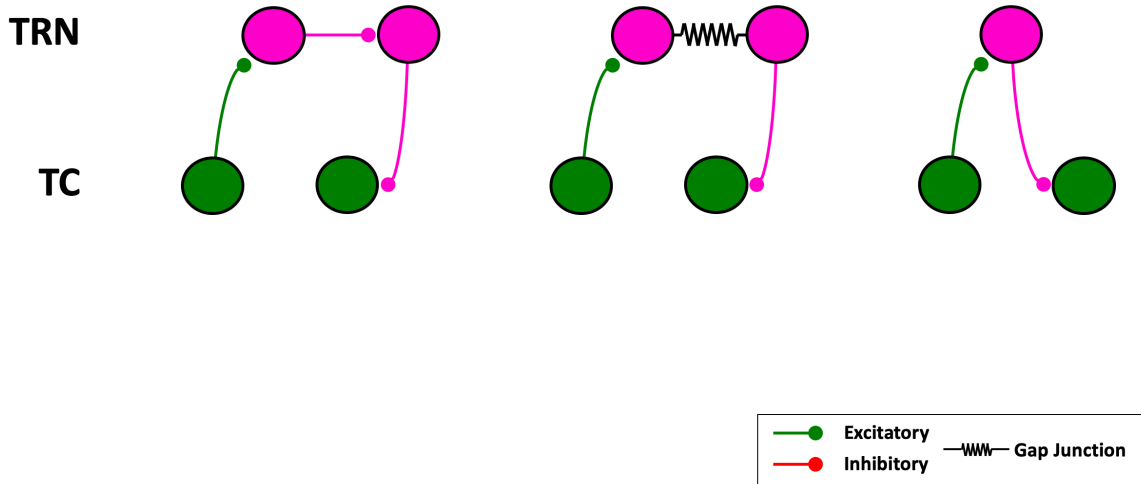

1501

1502 **Figure 1. A:** Closed- vs. open-loop thalamo-reticulo-thalamic configurations. **B:** Three possible pathways

1503 through which a signal might propagate from one thalamic relay (TC) neuron to another via the thalamic

1504 reticular nucleus (TRN).

**A**

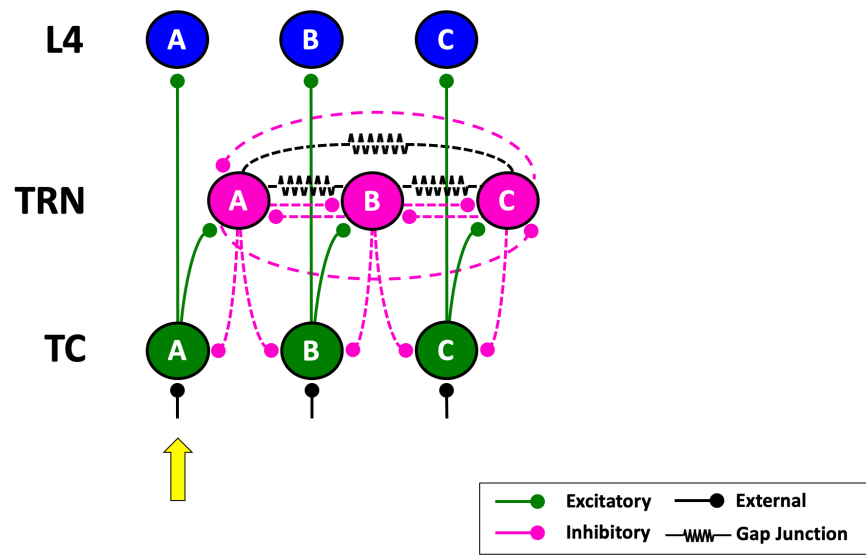

1505

**B**

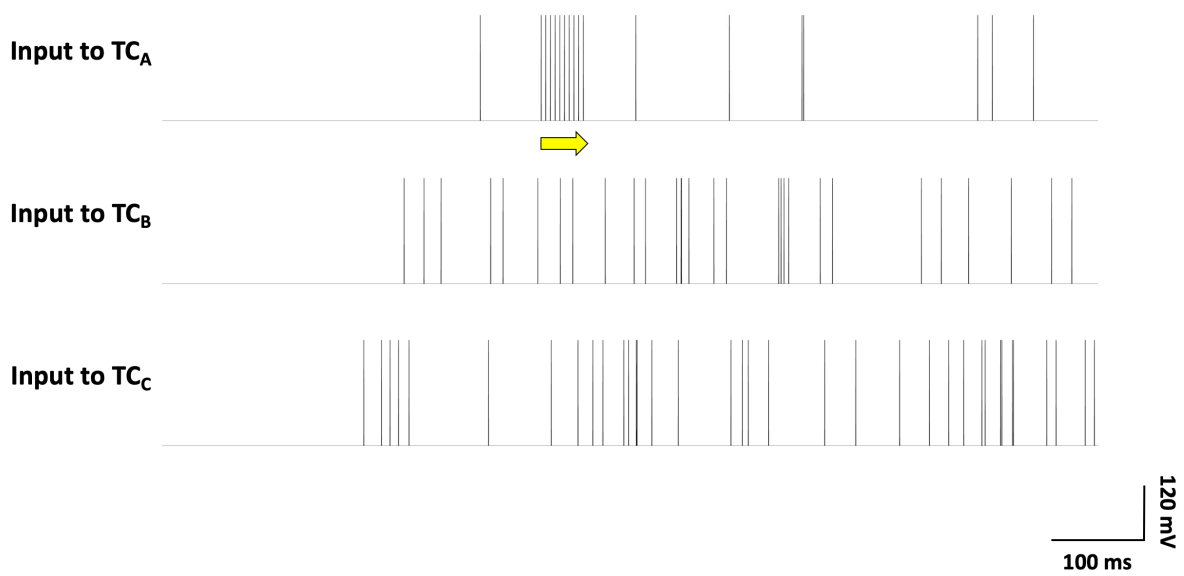

1506

C

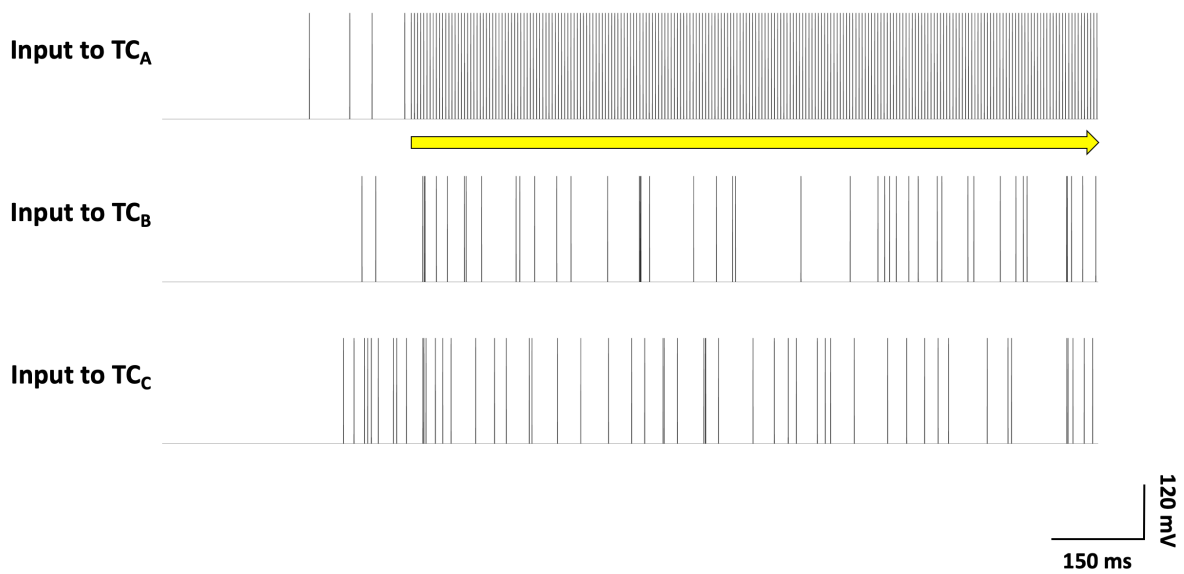

1507

1508 **Figure 2. A:** Baseline three-layer, three-“column” thalamo-reticulo-cortical model network. Broken-line

1509 synapses were allowed to vary either as a class (homogeneously) or independently of one another

1510 (heterogeneously). **B,C:** Samples of the external input delivered to the TC neuron layer. TC<sub>A</sub> received a

1511 combination of Poisson-modulated and fixed input, either punctate (B) or sustained (C).

1512

1513

1514

1515

1516

1517

1518

1519

1520

1521

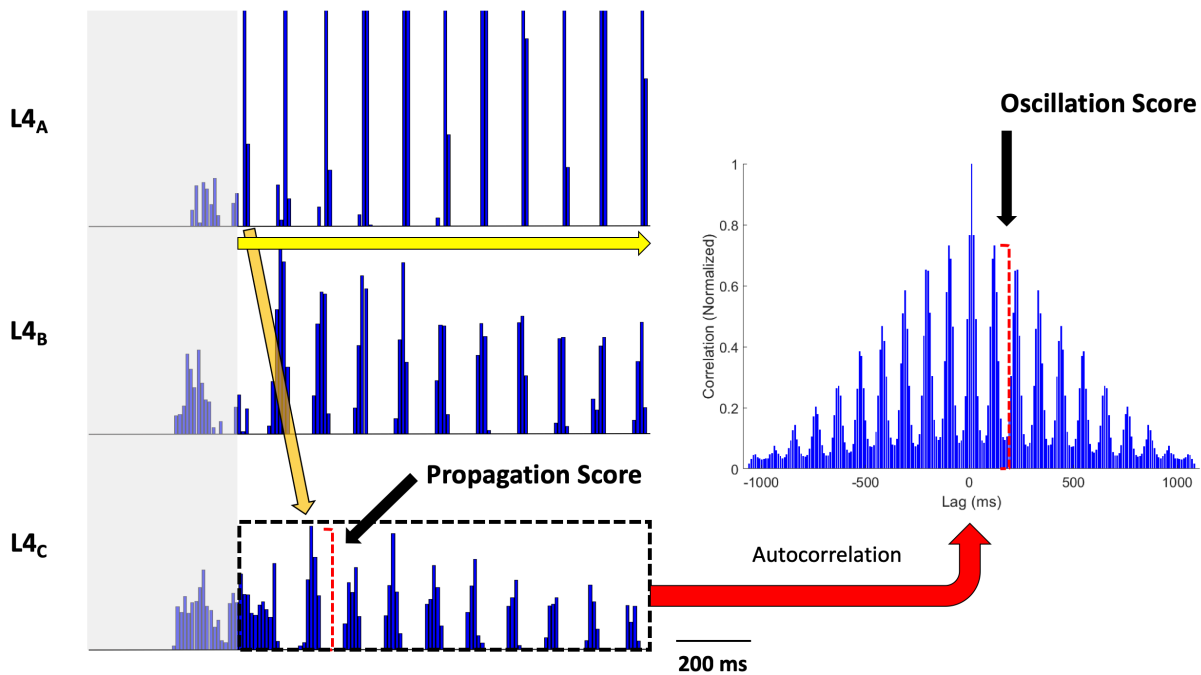

1522

1523 **Figure 3.** Sample detrended L4 spike histograms in a network permutation responding to a fixed,  
1524 sustained stimulus delivered to TC<sub>A</sub> (yellow arrow). The propagation score assigned to any network  
1525 permutation was quantified as the amplitude of the initial stimulus-evoked response in the detrended L4<sub>C</sub>  
1526 histogram; response propagation across the L4 subnetwork (orange arrow) was consistently linear, and  
1527 thus the initial response in L4<sub>C</sub> was observed at a fixed interval relative to the onset of stimulation.  
1528 Oscillation intrinsic to any network variant was quantified as the amplitude of the first off-center peak in  
1529 the normalized autocorrelogram (right) of post-stimulation activity in the detrended L4<sub>C</sub> histogram  
1530 (within broken black box). The initial 400 ms of activity preceding the fixed stimulus (in grey) is shown  
1531 here for each histogram but was not included in the calculations of either propagation or oscillation. Note  
1532 that the bin heights in the L4<sub>A</sub> histogram shown here were truncated in order to maintain identical vertical  
1533 scaling across all three L4 histograms.

1534

1535

1536

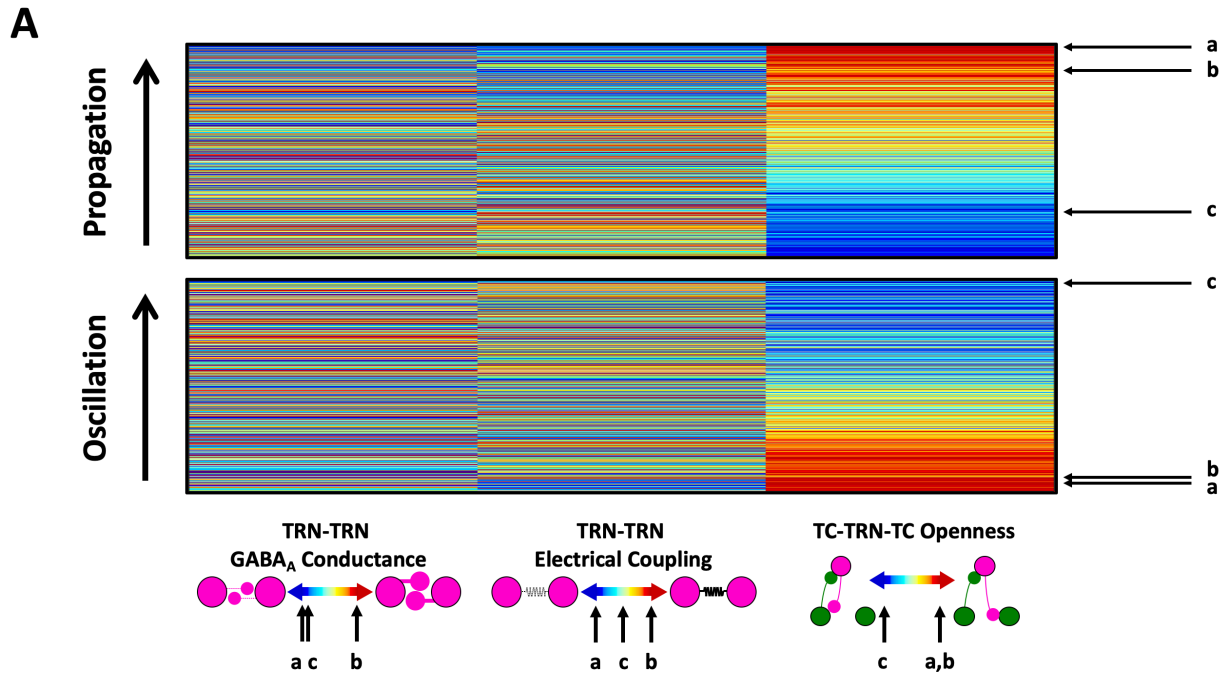

1537

**B**

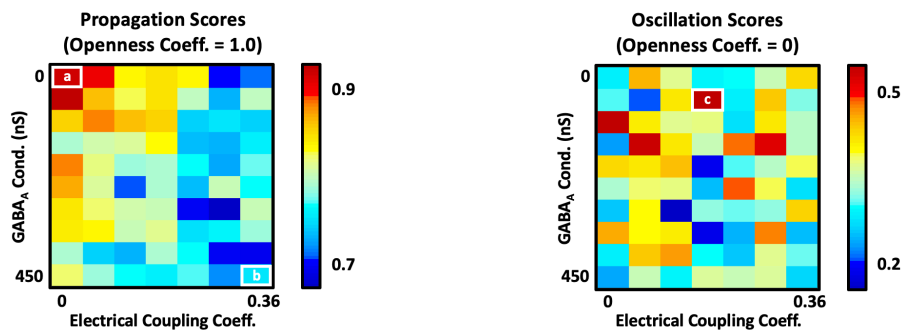

1538

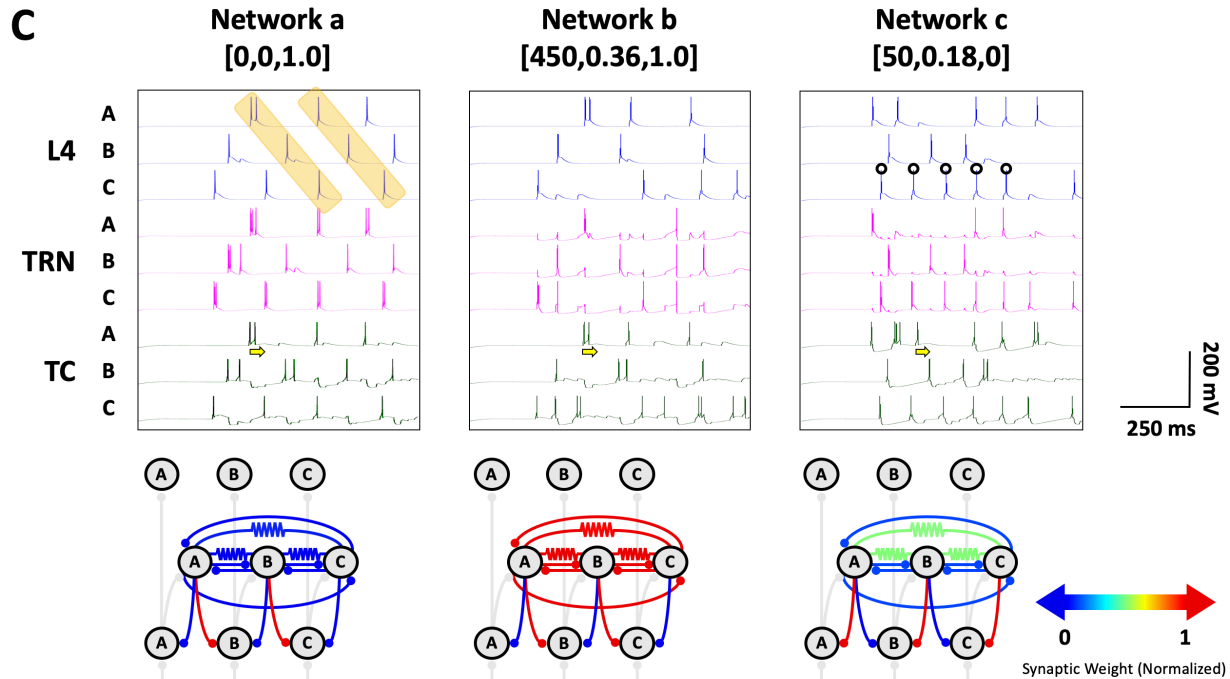

1539

1540 **Figure 4. A:** Ordinal heat maps ranking homogeneously synaptic network permutations according to the  
 1541 extent of supported signal propagation and oscillation in response to a fixed, punctate stimulus. Warmer  
 1542 colors correspond to higher values for each of the three synaptic class variables. The positions of three  
 1543 selected networks are indicated on both heat maps according to their propagation and oscillation scores.  
 1544 Each network is indexed by the synaptic variables ([TRN-TRN GABA<sub>A</sub> conductance (in nS), TRN-TRN  
 1545 electrical coupling coefficient, TC-TRN-TC openness coefficient]): a, [0,0,1.0]; b, [450,0.36,1.0]; and c,  
 1546 [50,0.18,0]. Networks with high degrees of TC-TRN-TC openness tended to best support signal  
 1547 propagation, while GABAergic synapses and electrical coupling between TRN neurons modestly  
 1548 impeded it. By contrast, networks with strong closed-loop reticulothalamic architectures were most  
 1549 permissive of oscillation, with TRN-TRN synaptic strength negligibly correlated with this property. **B:**  
 1550 Heat maps displaying propagation scores for the 70 fully open-loop homogeneously synaptic networks  
 1551 permutations (left, openness coefficient=1.0) and oscillation scores for the 70 fully closed-loop network  
 1552 permutations (right, openness coefficient=0), with the three selected networks indicated on the maps.  
 1553 Propagation was typically stronger in network permutations with minimal or nonexistent TRN-TRN  
 1554 connectivity (e.g., Network a, cf. Network b). **C:** Representative simulations and circuit diagrams

1555 depicting the normalized synaptic makeups for each of the three selected networks. The yellow arrow  
1556 indicates when the fixed, punctate stimulus was delivered to TC<sub>A</sub> in each simulation. Orange highlighting  
1557 indicates epochs of linear propagation, while circles are placed above spikes occurring during periods of  
1558 oscillatory activity. Note that the episode of oscillatory activity depicted in the simulation of Network c  
1559 changes frequency slightly following the third action potential.

1560

1561

1562

1563

1564

1565

1566

1567

1568

1569

1570

1571

1572

1573

1574

1575

1576

1577

1578

1579

1580

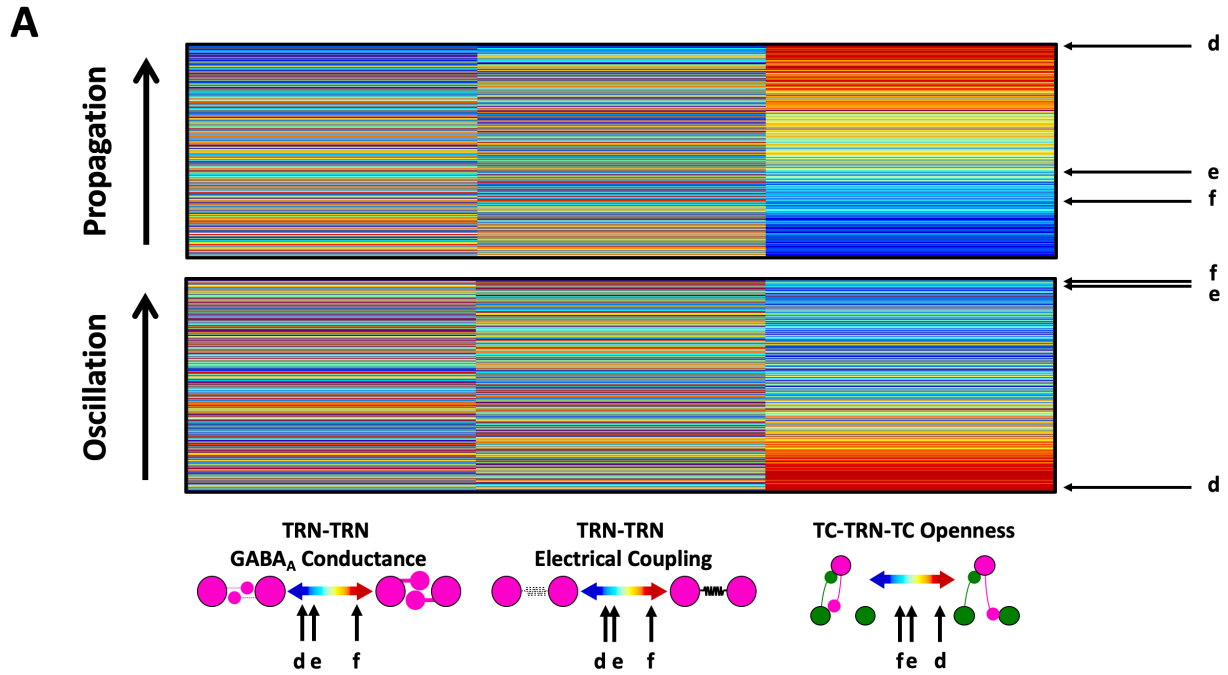

1581

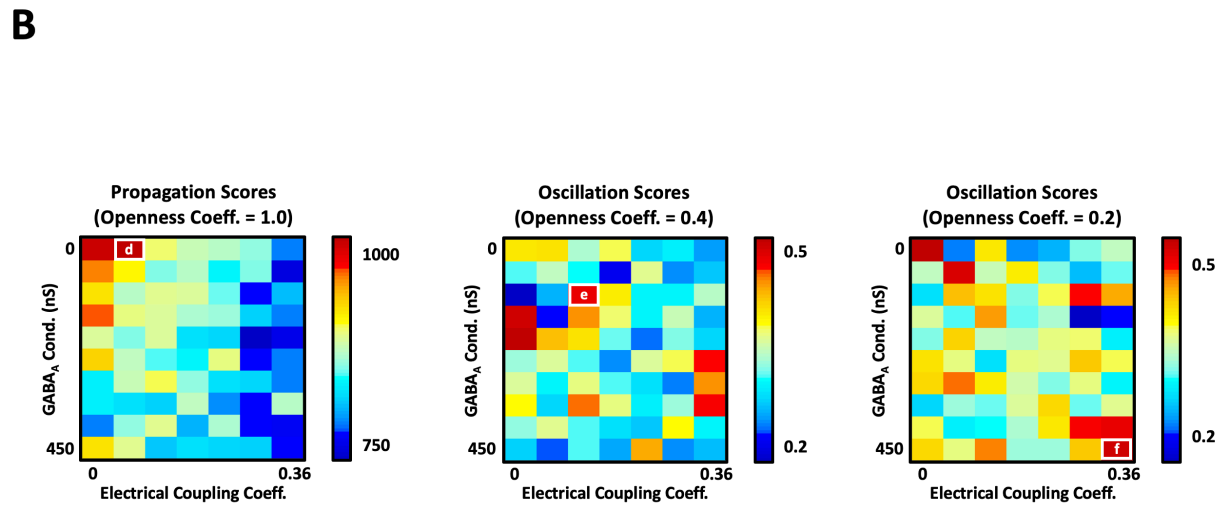

1582



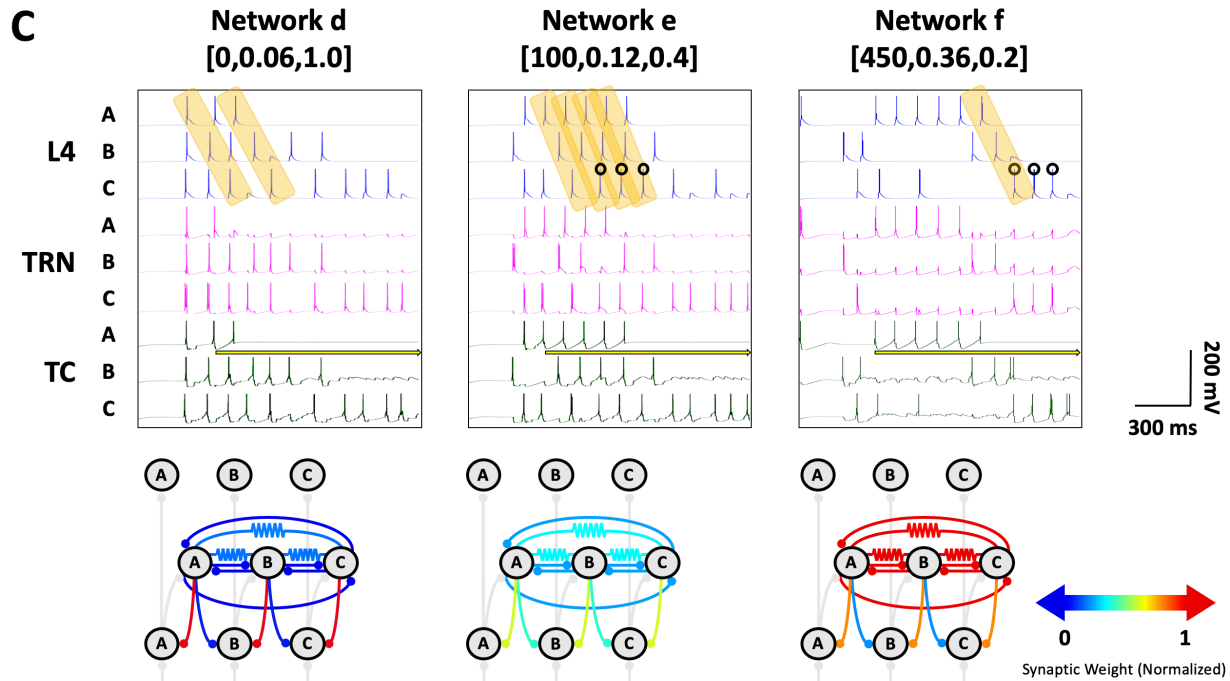

1583

**D**

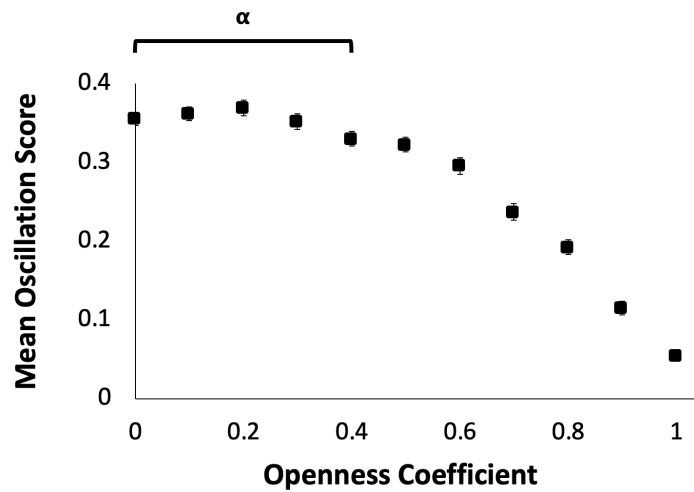

1584

1585 **Figure 5. A:** Ordinal heat maps ranking homogeneously synaptic network permutations according to the  
1586 extent of supported signal propagation and oscillation in response to a fixed, sustained stimulus. The  
1587 positions of three additional selected networks are indicated on both heat maps, with each selected  
1588 network indexed as in Figure 4: d, [0,0.06,1.0]; e, [100,0.12,0.4]; and f, [450,0.36,0.2]. As was the case

1589 with fixed, punctate stimulation, network propagation was strongest in networks exhibiting strong open-  
1590 loop TC-TRN-TC connectivity, while the inverse was true with oscillation. Both varieties of TRN-TRN  
1591 synapse tended to diminish propagation while exerting a negligible effect on oscillation. **B:** Heat maps  
1592 displaying propagation and oscillation scores in TRN-TRN synaptic parameter space at different values of  
1593 TC-TRN-TC openness, with the three selected networks indicated on the maps. Propagation was strongest  
1594 in exclusively open-loop networks (left, openness coefficient=1.0), while oscillation was more likely to  
1595 occur in networks with stronger closed-loop connectivity (middle, openness coefficient=0.4; right,  
1596 openness coefficient=0.2). **C:** Representative simulations and circuit diagrams depicting the normalized  
1597 synaptic makeups for each of the three additional selected networks. The yellow arrow indicates when the  
1598 fixed, sustained stimulus was delivered to TC<sub>A</sub> in each simulation. Note the two different mechanisms  
1599 underlying oscillation in the simulations of Networks e and f. **D:** Mean oscillation scores for networks  
1600 varied nonlinearly as a function of their openness coefficients, with networks possessing openness  
1601 coefficients of 0 and 0.4 ( $\alpha$ ) supporting oscillation to equal extents (one-way ANOVA with Tukey post-  
1602 hoc tests,  $F(10,759)=137.8$ ,  $p<0.0001$ ). Error bars indicate standard errors of the mean.

1603

1604

1605

1606

1607

1608

1609

1610

1611

1612

1613

1614

**A**

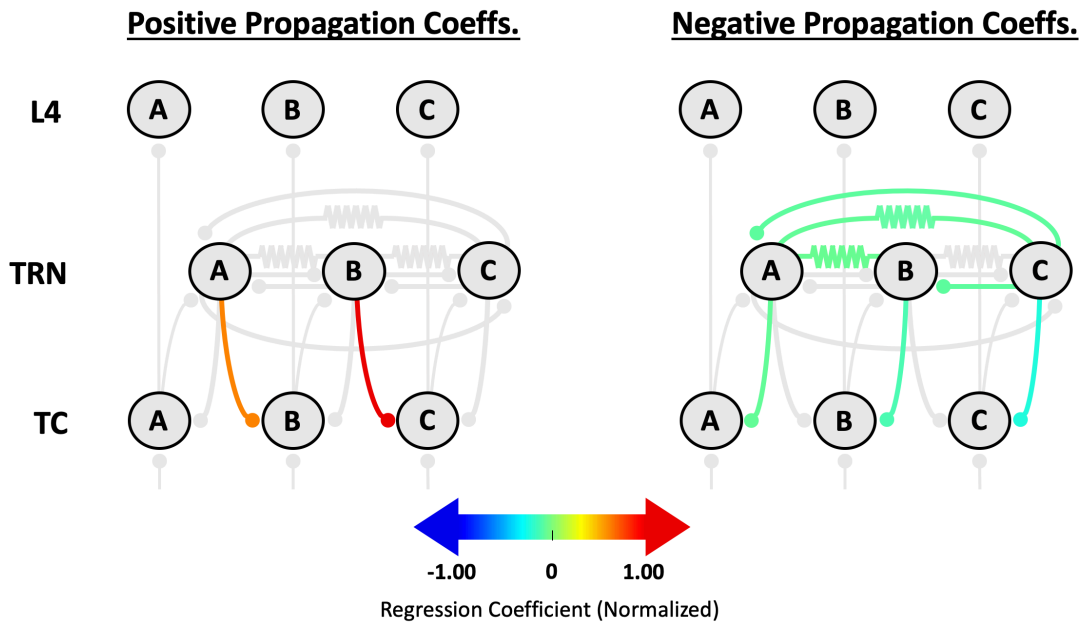

1615

**B**

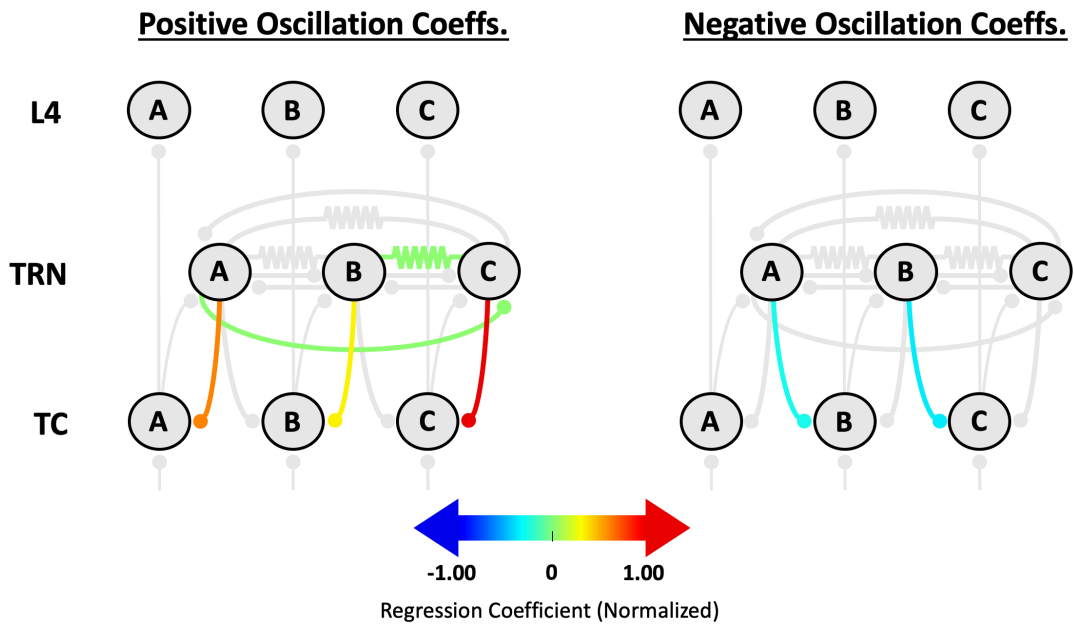

1616

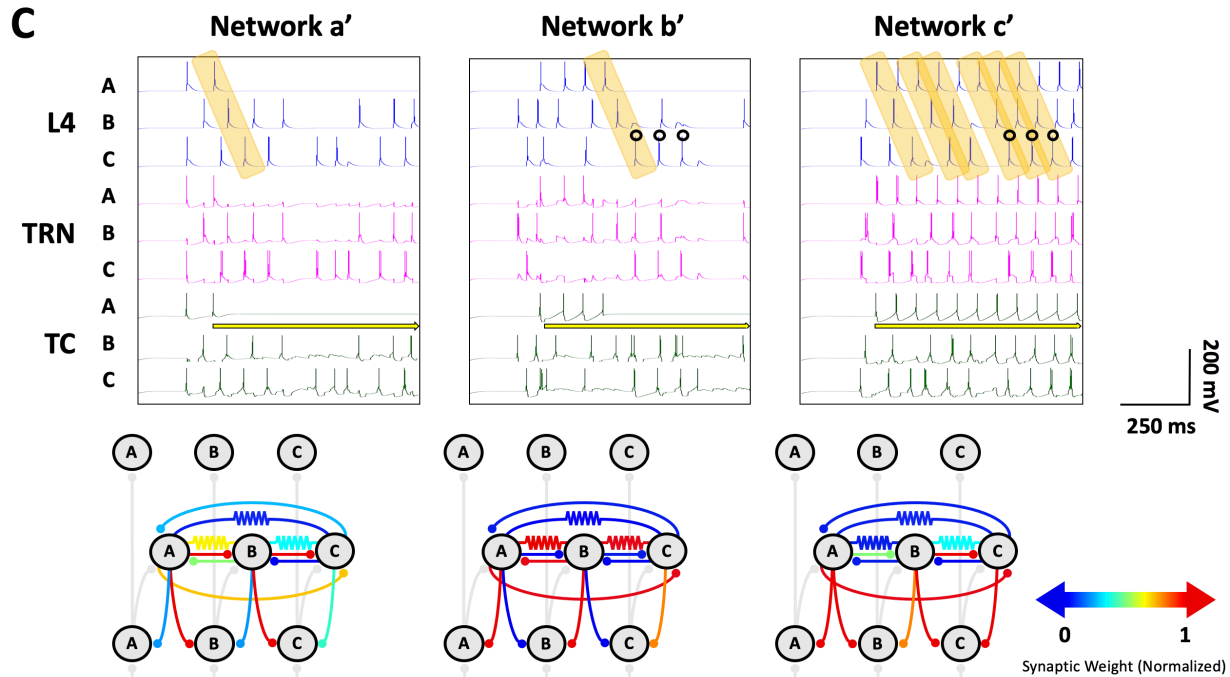

1617

1618 **Figure 6. A,B:** Network regression models illustrating how propagation (A) and oscillation (B) varied as

1619 a function of individual synaptic weights across simulated heterogeneously synaptic network

1620 permutations responding to a fixed, sustained stimulus delivered to TC<sub>A</sub>. Gray synapses are either non-

1621 variable or associated with normalized regression coefficients with absolute values under 0.05. Synapses

1622 with positive and negative coefficients in the regression models are depicted separately in the left- and

1623 right-sided circuit diagrams, respectively. **C:** Representative simulations for three selected heterogeneous

1624 networks, whose normalized synaptic weights are depicted in the circuit diagrams. The yellow arrow

1625 indicates when the fixed, sustained stimulus was delivered to TC<sub>A</sub> in each simulation. Networks a', b',

1626 and c' respectively illustrate propagation, self-contained generation of oscillation in network "Column C,"

1627 and propagation of oscillation from Column A to Column C.

1628

1629

1630

1631

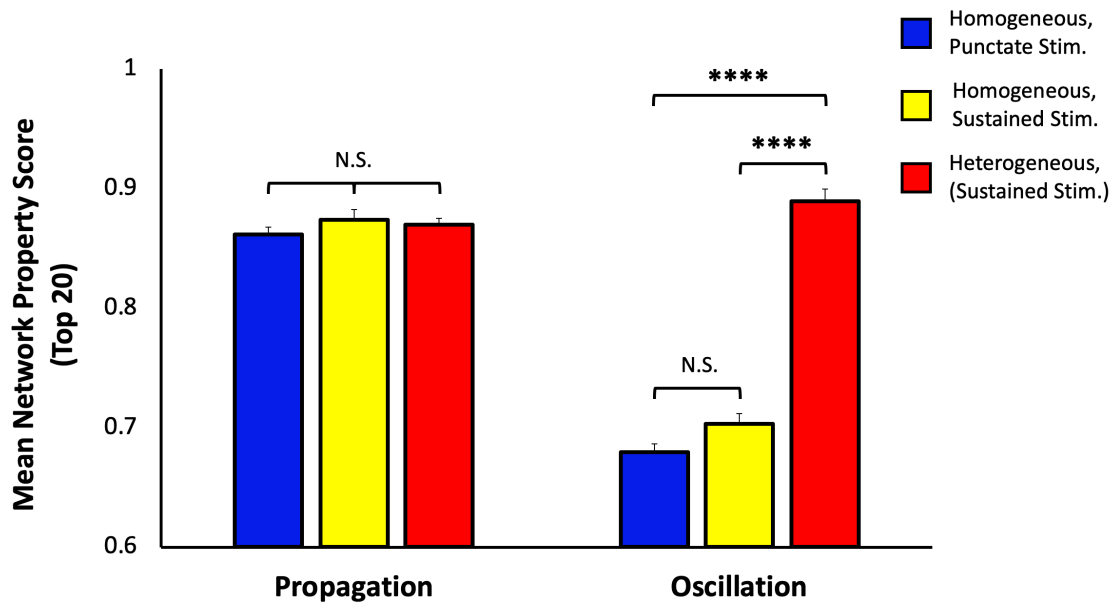

1632

1633 **Figure 7.** Propagation, as measured in those network permutations scoring highest with respect to the  
1634 property, was equally supported in networks where synaptic weights varied independently of one another  
1635 (**heterogeneously**; red) as in networks where synaptic strength varied **homogeneously** (blue, yellow) by  
1636 class [one-way ANOVA,  $F(2,59)=0.84$ ,  $p=0.437$ ]. By contrast, oscillation scores were significantly  
1637 higher in top-performing heterogeneous networks than their homogeneous counterparts [one-way  
1638 ANOVA with Tukey's HSD tests,  $F(2,59)=166.14$ ,  $p<0.0001$ ], while there was no significant difference  
1639 in oscillation among top-performing homogeneous network variants when stimulated externally in a  
1640 fixed, punctate (blue) or sustained (yellow) manner (Tukey's test,  $p=0.153$ ). Each bar corresponds to a  
1641 mean of the top 20 network propagation or oscillation scores within each synaptic architecture/fixed  
1642 stimulation group; error bars indicate standard errors of the mean. \*\*\*\*=Tukey's test,  $p<0.0001$ ; N.S.=not  
1643 significant.

1644

1645

1646

1647

| Model Cellular Parameters                           |         |          |          |
|-----------------------------------------------------|---------|----------|----------|
| Parameter                                           | TC cell | TRN cell | L4 cell  |
| Leak conductance, $g_L$ (nS)                        | 3.263   | 3.7928   | 4.8128   |
| Leak reversal potential, $E_L$ (mV)                 | -60.03  | -57      | -60.2354 |
| Transient sodium conductance, $g_{Na}$ (nS)         | 1,500   | 3,000    | 3,000    |
| Sodium equilibrium potential, $E_{Na}$ (mV)         | 50      |          |          |
| Delayed-rectifier potassium conductance, $g_K$ (nS) | 520     | 400      | 140      |
| M-type potassium conductance, $g_M$ (nS)            | -       | 3.5      | 1.5      |
| M-type potassium time constant, $\tau_M$ (ms)       | -       | 200      | 180      |
| Potassium equilibrium potential, $E_K$ (mV)         | -100    |          | -90      |
| T-type calcium conductance, $g_T$ (nS)              | 45      | 21       | -        |
| Calcium equilibrium potential, $E_T$ (mV)           | 120     |          |          |
| H-current conductance, $g_H$ (nS)                   | 0.608   | 0.0192   | -        |
| H-current reversal potential, $E_H$ (mV)            | -33     |          | -        |
| Membrane capacitance, $C_m$ (pF)                    | 100.4   | 75.0     | 109.3865 |

1648

1649 **Table 1.** Intrinsic model cellular parameters.

1650

1651

1652

1653

1654

1655

1656

1657

1658

1659

1660

1661

1662

| Model Synaptic Parameters                                   |                   |                  |                            |                            |                         |          |
|-------------------------------------------------------------|-------------------|------------------|----------------------------|----------------------------|-------------------------|----------|
| Synapse                                                     | Neurotransmitter  | Conductance (nS) | $\tau_{\text{recov}}$ (ms) | $\tau_{\text{inact}}$ (ms) | Reversal Potential (mV) | $U_{SE}$ |
| External synapse to TC cell                                 | (Glutamate)       | 32               | 125                        | 2.64                       | 0                       | 0.76     |
| TC-to-TRN cell synapse (TC-TRN)                             | Glutamate         | 150              | 500                        | 2.64                       | 0                       | 0.76     |
| TC-to-L4 cell synapse (TC-L4)                               | Glutamate         | 50               | 160                        | 11.52                      | 0                       | 0.8113   |
| TRN-to-TC cell synapse (TRN-TC)                             | GABA <sub>A</sub> | Variable (0-80)  | 167.29                     | 16.62                      | -80                     | 0.62     |
| Chemical TRN-to-TRN cell synapse (TRN-TRN <sub>GABA</sub> ) | GABA <sub>A</sub> | Variable (0-450) | 225                        | 15                         | -75                     | 0.62     |

1663

1664 **Table 2.** Model synaptic parameters. The external synapse to TC neurons, through which both fixed and  
1665 stochastic inputs were delivered, was generically excitatory but explicitly modeled on glutamatergic  
1666 retinogeniculate synapse (Chen and Regehr, 2003). The  $\tau_{\text{recov}}$ ,  $\tau_{\text{inact}}$ , and  $U_{SE}$ , parameters derived from the  
1667 synaptic depression model of Tsodyks and Markram (1997; Tsodyks et al., 1998), represent the time  
1668 constant for post-exocytotic synaptic recovery, the time constant characterizing synaptic inactivation  
1669 following the onset of presynaptic neurotransmitter release, and the fraction of available “resources”  
1670 (synaptic vesicles) available for release at the presynaptic terminal following action potential induction.  
1671 The conductances of both TRN-TC and TRN-TRN<sub>GABA</sub> synapses were allowed to vary within the  
1672 specified ranges.

1673

1674

1675

1676

1677

1678

1679

1680

1681

1682

1683

| Normalized Regression Coefficients (NRCs)         |                       |                   |                       |                   |
|---------------------------------------------------|-----------------------|-------------------|-----------------------|-------------------|
| Synaptic Variable                                 | Propagation<br>Linear | Propagation<br>2° | Oscillation<br>Linear | Oscillation<br>2° |
| TRN-TRN <sub>GABA</sub>                           | -0.137                | -0.413            | 0.058                 | -                 |
| TRN-TRN <sub>Elec</sub>                           | -0.193                | -0.499            | 0.064                 | 0.056             |
| TRN-TC                                            | 1.000                 | 1.000             | -1.000                | -1.000            |
| (TRN-TRN <sub>GABA</sub> ) <sup>2</sup>           | -                     | 0.117             | -                     | -                 |
| (TRN-TRN <sub>Elec</sub> ) <sup>2</sup>           | -                     | 0.266             | -                     | -                 |
| (TRN-TC) <sup>2</sup>                             | -                     | 0.213             | -                     | -0.010            |
| TRN-TRN <sub>GABA</sub> x TRN-TRN <sub>Elec</sub> | -                     | 0.226             | -                     | -                 |
| TRN-TRN <sub>Elec</sub> x TRN-TC                  | -                     | -0.239            | -                     | -                 |

1684

1685 **Table 3.** Normalized linear and second-order regression coefficients for propagation and oscillation in  
 1686 homogeneously synaptic networks excited by a fixed, punctate stimulus. The regressions include 1°, 2°,  
 1687 and interaction terms corresponding to TRN-TRN<sub>GABA</sub>, TRN-TRN<sub>Elec</sub>, and open-loop TC-TRN-TC  
 1688 synapses/pathways. Terms associated with regression coefficients of absolute values < 0.05 are omitted.  
 1689 Positive and negative terms are highlighted in red and blue, respectively. Linear regression for  
 1690 propagation,  $R^2=0.829$ , RMSE=0.042,  $p<0.0001$ ; second-order regression for propagation,  $R^2=0.863$ ,  
 1691 RMSE=0.039,  $p<0.0001$ ; linear regression for oscillation,  $R^2=0.661$ , RMSE=0.137,  $p<0.0001$ ; second-  
 1692 order regression for oscillation,  $R^2=0.687$ , RMSE=0.132,  $p<0.0001$ .

1693

1694

1695

1696

1697

1698

1699

1700



| Normalized Regression Coefficients (NRCs)         |                       |                   |                       |                   |
|---------------------------------------------------|-----------------------|-------------------|-----------------------|-------------------|
| Synaptic Variable                                 | Propagation<br>Linear | Propagation<br>2° | Oscillation<br>Linear | Oscillation<br>2° |
| TRN-TRN <sub>GABA</sub>                           | -0.173                | -0.670            | -                     | 0.060             |
| TRN-TRN <sub>Elec</sub>                           | -0.136                | -0.347            | -                     | -                 |
| TRN-TC                                            | 1.000                 | 1.000             | -1.000                | -0.052            |
| (TRN-TRN <sub>GABA</sub> ) <sup>2</sup>           | -                     | 0.332             | -                     | -                 |
| (TRN-TRN <sub>Elec</sub> ) <sup>2</sup>           | -                     | 0.164             | -                     | -                 |
| (TRN-TC) <sup>2</sup>                             | -                     | 0.594             | -                     | -1.000            |
| TRN-TRN <sub>GABA</sub> x TRN-TRN <sub>Elec</sub> | -                     | 0.262             | -                     | -                 |
| TRN-TRN <sub>GABA</sub> x TRN-TC                  | -                     | -0.152            | -                     | -                 |
| TRN-TRN <sub>Elec</sub> x TRN-TC                  | -                     | -0.365            | -                     | -                 |

1701

1702

**Table 4.** Normalized linear and second-order regression coefficients for propagation and oscillation in

1703

homogeneously synaptic networks excited by a fixed, sustained stimulus. Linear regression for

1704

propagation,  $R^2=0.793$ , RMSE=0.047,  $p<0.0001$ ; second-order regression for propagation,  $R^2=0.842$ ,

1705

RMSE=0.041,  $p<0.0001$ ; linear regression for oscillation,  $R^2=0.526$ , RMSE=0.145,  $p<0.0001$ ; second-

1706

order regression for oscillation,  $R^2=0.630$ , RMSE=0.128,  $p<0.0001$ .

1707

1708

1709

1710

1711

1712

1713

1714

1715

1716

| Normalized Regression Coefficients (NRCs)          |                    |                |                    |                |
|----------------------------------------------------|--------------------|----------------|--------------------|----------------|
| Synaptic Variable                                  | Propagation Linear | Propagation 2° | Oscillation Linear | Oscillation 2° |
| TRN <sub>A</sub> -TRN <sub>C</sub>                 | -                  | -              | 0.115              | -              |
| TRN <sub>C</sub> -TRN <sub>A</sub>                 | -0.088             |                |                    |                |
| TRN <sub>C</sub> -TRN <sub>B</sub>                 | -0.084             | -0.073         | -                  | -              |
| TRN <sub>A</sub> =TRN <sub>B</sub>                 | -0.051             | -0.091         | -                  | -              |
| TRN <sub>A</sub> =TRN <sub>C</sub>                 | -0.072             | -              | -                  | -              |
| TRN <sub>B</sub> =TRN <sub>C</sub>                 | -                  | -0.113         | 0.117              | -              |
| TRN <sub>A</sub> -TC <sub>A</sub>                  | -0.075             | -              | 0.621              | 0.077          |
| TRN <sub>A</sub> -TC <sub>B</sub>                  | 0.608              | 0.571          | -0.289             | -1.000         |
| TRN <sub>B</sub> -TC <sub>B</sub>                  | -0.128             | -0.196         | 0.333              | 0.417          |
| TRN <sub>B</sub> -TC <sub>C</sub>                  | 1.000              | 1.000          | -0.379             | -0.892         |
| TRN <sub>C</sub> -TC <sub>C</sub>                  | -0.207             | -0.239         | 1.000              | 0.107          |
| (TRN <sub>C</sub> -TRN <sub>B</sub> ) <sup>2</sup> | -                  | 0.079          | -                  | -              |
| (TRN <sub>A</sub> -TC <sub>B</sub> ) <sup>2</sup>  | -                  | -0.245         | -                  | 0.189          |
| (TRN <sub>A</sub> -TC <sub>B</sub> ) <sup>2</sup>  | -                  | 0.174          | -                  | -0.093         |
| (TRN <sub>B</sub> -TC <sub>C</sub> ) <sup>2</sup>  | -                  | -0.472         | -                  | 0.278          |
| (TRN <sub>C</sub> -TC <sub>C</sub> ) <sup>2</sup>  | -                  | 0.187          | -                  | -0.146         |

| Normalized Regression Coefficients (NRCs), continued                    |                |                |
|-------------------------------------------------------------------------|----------------|----------------|
| Synaptic Variable                                                       | Propagation 2° | Oscillation 2° |
| TRN <sub>A</sub> -TRN <sub>B</sub> x TRN <sub>A</sub> -TC <sub>B</sub>  | 0.070          | -              |
| TRN <sub>A</sub> -TRN <sub>C</sub> x TRN <sub>C</sub> -TC <sub>C</sub>  | -              | 0.215          |
| TRN <sub>B</sub> -TRN <sub>A</sub> x TRN <sub>A</sub> =TRN <sub>B</sub> | -              | 0.111          |
| TRN <sub>B</sub> -TRN <sub>A</sub> x TRN <sub>A</sub> -TC <sub>A</sub>  | -              | -0.186         |
| TRN <sub>C</sub> -TRN <sub>A</sub> x TRN <sub>A</sub> -TC <sub>A</sub>  | -              | -0.172         |
| TRN <sub>C</sub> -TRN <sub>A</sub> x TRN <sub>A</sub> -TC <sub>B</sub>  | -0.119         | -              |
| TRN <sub>C</sub> -TRN <sub>A</sub> x TRN <sub>B</sub> -TC <sub>C</sub>  | -0.096         | -              |
| TRN <sub>C</sub> -TRN <sub>B</sub> x TRN <sub>B</sub> -TC <sub>C</sub>  | -0.153         | -              |
| TRN <sub>A</sub> =TRN <sub>B</sub> x TRN <sub>B</sub> -TC <sub>C</sub>  | -              | -0.129         |
| TRN <sub>A</sub> =TRN <sub>C</sub> x TRN <sub>A</sub> -TC <sub>A</sub>  | -              | -0.114         |
| TRN <sub>A</sub> =TRN <sub>C</sub> x TRN <sub>C</sub> -TC <sub>C</sub>  | -0.079         | -              |
| TRN <sub>A</sub> -TC <sub>A</sub> x TRN <sub>A</sub> -TC <sub>B</sub>   | -              | 0.634          |
| TRN <sub>A</sub> -TC <sub>A</sub> x TRN <sub>B</sub> -TC <sub>C</sub>   | -              | 0.449          |
| TRN <sub>A</sub> -TC <sub>B</sub> x TRN <sub>B</sub> -TC <sub>B</sub>   | -0.166         | 0.361          |
| TRN <sub>A</sub> -TC <sub>B</sub> x TRN <sub>B</sub> -TC <sub>C</sub>   | 0.753          | -0.274         |
| TRN <sub>A</sub> -TC <sub>B</sub> x TRN <sub>C</sub> -TC <sub>C</sub>   | -0.106         | 0.669          |
| TRN <sub>B</sub> -TC <sub>B</sub> x TRN <sub>B</sub> -TC <sub>C</sub>   | -              | 0.345          |
| TRN <sub>B</sub> -TC <sub>B</sub> x TRN <sub>C</sub> -TC <sub>C</sub>   | -              | -0.192         |
| TRN <sub>B</sub> -TC <sub>C</sub> x TRN <sub>C</sub> -TC <sub>C</sub>   | -0.124         | 0.399          |

1717

1718 **Table 5.** Normalized linear and second-order regression coefficients for oscillation, propagation, and  
 1719 optimization in heterogeneously synaptic networks excited by a fixed, sustained stimulus. The regressions  
 1720 include 1°, 2°, and interaction terms corresponding to the 14 variable synapses in the networks. Equal  
 1721 signs denote gap junctions. Linear regression for propagation,  $R^2=0.742$ , RMSE=0.069,  $p<0.0001$ ;  
 1722 second-order regression for propagation,  $R^2=0.857$ , RMSE=0.051,  $p<0.0001$ ; linear regression for  
 1723 oscillation,  $R^2=0.253$ , RMSE=0.131,  $p<0.0001$ ; second-order regression for oscillation,  $R^2=0.388$ ,  
 1724 RMSE=0.118,  $p<0.0001$ .
